# Supplementary material for: Comparison and validation of global and regional ocean forecasting systems in the South China Sea
Source: Copernicus journal article supplement (doi:10.5194/nhess-2016-60), 2016-02-25
Supplement: Supplementary file [file nhess-2016-60-AC2-supplement.pdf]

1 **Comparison and validation of global and regional ocean**  
2 **forecasting systems [forin](#) the South China Sea**

3 Xueming Zhu<sup>1</sup>, Hui Wang<sup>1</sup>, Guimei Liu<sup>1\*</sup>, Charly Régnier<sup>2</sup>, Xiaodi Kuang<sup>1</sup>, Dakui  
4 Wang<sup>1</sup>, Shihe Ren<sup>1</sup>, Zhiyou Jing<sup>3</sup>, Marie Drévillon<sup>2</sup>

5

6 <sup>1</sup>Key Laboratory of Research on Marine Hazards Forecasting, National Marine Environmental  
7 Forecasting Center, Beijing, 100081, China

8 <sup>2</sup>Mercator Océan, Ramonville Saint Agne, France

9 <sup>3</sup>State Key Laboratory of Tropical Oceanography, South China Sea Institute of Oceanology, Chinese  
10 Academy of Sciences, Guangzhou, 510301, China

11 *Correspondence to:* Guimei Liu (liugm@nmefc.gov.cn)

12 **Abstract.** In this paper, the performances of two operational ocean forecasting systems, the global  
13 Mercator Océan (MO) Operational System, developed and maintained by Mercator Océan in France and  
14 the regional South China Sea Operational Forecasting System (SCSOFS) by the National Marine  
15 Environmental Forecasting Center (NMEFC) in China, have been examined. Both systems can provide  
16 science-based nowcast/forecast products, ~~such as~~ of temperature, salinity, water level and ocean  
17 circulations. ~~Based on the observed satellite and in situ data have been obtained in 2012 in the South~~  
18 ~~China Sea, the~~ Comparison and validation of the ocean circulations, the structures of the temperature  
19 and salinity, and some mesoscale activities, such as ocean fronts, Typhoon, and mesoscale eddy, are  
20 ~~conducted shown based on the observed satellite and in-situ data obtained in 2012 in the South China~~  
21 ~~Sea.~~ The results showed that ~~Comparing with the observation,~~ MO performs better in simulating the  
22 ocean circulations and SST ~~of MO show better results than those of SCSOFS, and SCSOFS. However,~~  
23 ~~performs better in simulating~~ the structures of temperature and salinity ~~of SCSOFS are better than those~~  
24 ~~of MO.~~ For the mesoscale activities, SCSOFS performance is better than MO in simulating SST fronts  
25 and SST decreasing during the typhoon Tembin ~~of SCSOFS are better agreement compared~~ with the  
26 previous studies ~~and~~ and satellite data ~~than those of MO;~~ but model results from both of SCSOFS and  
27 MO ~~them~~ show some differences from satellite observations ~~AVISO data.~~ ~~Finally, according to the~~  
28 ~~outcome of the results comparisoned in above,~~ In conclusion, some recommendations ~~suggestions~~ have  
29 been proposed for both forecast systems to improve their forecasting performances in the near further  
30 based on our comparison and validation.

31 **Keywords.** SCSOFS, Mercator Océan, South China Sea, Operational Forecasting System

## 32 1 Introduction

33 The South China Sea (SCS, Fig.1) is the largest and deepest semi-enclosed marginal sea of the  
34 Northwest ~~ern~~ Pacific Ocean (NWP), with the area ~~is~~ about 3.5 million km<sup>2</sup>, the mean and maximum  
35 depth ~~is~~ about 1200\_m and 5300\_m, respectively. The northern SCS (NSCS) is a wide continental shelf  
36 with depth less than 200\_m ~~located in the northern SCS (NSCS), and the southern SCS (SSCS) is a large~~  
37 ~~basin, comprisinges.~~ ~~There are~~ numerous islands, reefs, beaches, shoals ~~in large basin of the southern~~  
38 ~~SCS (SSCS).~~ SCS is connected with the adjacent seas through a number of channels, to the East China  
39 Sea in north, to the NWP in east, to the Sulu Sea in southeast, and to the Java Sea in south, by the Taiwan

40 Strait (TWS), the Luzon Strait (LUS), the Mindoro Strait and the Balabac Strait, the Karimata Strait,  
41 respectively. SCS has its unique geographical features, rich marine mineral and petroleum resources so  
42 that it is very important for ~~play a significant role to~~ many countries adjacent to it.

43 The SCS is located in the East Asian Monsoon (EAM) winds regime, the northeasterly winds usually  
44 prevail with an average wind speed of 9 m/s over the whole domain in winter, while the southwesterly  
45 winds prevail with an average magnitude of 6 m/s dominating over the most parts of the SCS in summer  
46 (Hellerman and Rosenstein, 1983). The EAM is considered to be the major factors for driving the upper  
47 layer basin-scale circulation pattern in the entire SCS, showing an obvious seasonal variation with a  
48 cyclonic gyre in winter and an anti-cyclonic gyre in summer (Wyrski, 1961; Mao et al., 1999; Wu et al.,  
49 1999; Qu, 2000; Chu and Li, 2000). However, some other literatures insist that a persistent cyclonic gyre  
50 is present in the NSCS, while a semiannually changing from a cyclonic gyre in winter to an  
51 anti-cyclonic gyre regime in summer can be observed in the SCS (Chao et al., 1996; Takano et al., 1998;  
52 Hu et al., 2000; Chern and Wang, 2003; Caruso et al., 2006; Chern et al., 2010). Chern et al. (2010)  
53 suggested that the three dynamical processes, the wind stress curl, the deep-water ventilation-induced  
54 vortex stretching in the central SCS, and a positive vorticity generated from the left flank of the Kuroshio  
55 in the LUS, play the equal importance to the formation of the persistent cyclonic gyre in the NSCS,  
56 according to the analysis of the results from several numerical experiments with different wind stress,  
57 topography and coastline.

58 In addition to the basin-scale circulations, there are still some sub-basin scale currents in the SCS, such as  
59 the Guangdong Coastal Current (Huang et al., 1992), the SCS Warm Current (SCSWC, Guan, 1978;  
60 Chao et al., 1995), Dongsha Coastal Current (DCC, Su, 2005), Luzon Coastal Current (LCC, Hu et al.,  
61 2000), and so on. However, there are still a lot of debates about the mechanisms of some of them among  
62 the studies reported by several authors, without reaching an agreement. For example, based on the results  
63 of the numerical simulations, the formation dynamical mechanism of the SCSWC may be related to the  
64 Kuroshio intrusion (Li et al., 1993; Cai and Wang, 1997), sea surface slope (Fang and Zhao, 1988; Guan,  
65 1993), or the wind relaxation (Chao et al., 1995).

66 The Kuroshio intrudes into the SCS through the LUS, carrying the warm and salty water from the NWP,  
67 significantly affecting the circulation pattern and the budgets of heat and salt in the NSCS (Farris and  
68 Wimbush, 1996; Wu and Chiang, 2007; Liang et al., 2008; Nan et al., 2013). However, it is still not in  
69 accordance onwith how the Kuroshio intrudes into the NSCS. As pointed out in Hu et al. (2000), there

70 ~~were existed~~ four viewpoints on the Kuroshio intrusion as follow, a direct branch from the Kuroshio  
71 (Williamson, 1970; Fang et al., 1996; Chern and Wang, 1998; Qu et al., 2000), a form of loop (Zhang et  
72 al., 1995; Liu et al., 1996; Farris and Wimbush, 1996), a form of extension (Hu et al., 1999), and a form  
73 of ring (Li et al., 1998a, b) at present. Nan et al. (2015) reviewed and summarized the Kuroshio intruding  
74 processes from observed data, numerical experiments and theoretical analyses, and concluded that there  
75 were three typical paths of the Kuroshio intruding the SCS, the looping path, the leaking path and the  
76 leaping path, which could be distinguished quantitatively by a Kuroshio SCS Index (KSI, Nan et al.,  
77 2011a) derived from the integral of geostrophic vorticity southwest of Taiwan. The three paths can  
78 change from one to another in several weeks.

79 In addition, many mesoscale eddy activities are another obvious physical characteristics of the NSCS,  
80 and ~~have play a significant great~~ influence ~~ion~~ on the dynamical environment of the NSCS. Eddies are  
81 generally more energetic than the surrounding currents and are an important component of dynamical  
82 oceanography at all scales. In particular, they transport heat, mass, momentum and biogeochemical  
83 properties from their regions ~~where they are formed of formation~~ to remote areas where they can, then  
84 impact budgets of ~~the tracers~~ heat, mass, momentum and biogeochemical properties. Eddies in the NSCS  
85 have attracted increasing attentions over recent ~~a few~~ decades. Much work has been done based on the  
86 combination of satellite observations and *in-situ* hydrographic data (Wang and Chern, 1987; Li et al.,  
87 1998; Chu et al., 1999; Wang et al., 2003; Hu et al., 2011; Nan et al., 2011b), or numerical models (Wu  
88 and Chiang, 2007; Xiu et al., 2010; Zhuang et al., 2010). Some of work ~~had been~~ focused on the  
89 statistical characteristics of eddies in the SCS, but they are greatly different from each other, owing to  
90 different criteria for eddy identification employed by different literatures (Wang et al., 2003; Xiu et al.,  
91 2010; Du et al., 2014). Some of work analyzed eddies' seasonal variability (Wu and Chiang, 2007;  
92 Zhuang et al., 2010) and investigated their genesis (Wang et al., 2008). Some of work mainly studied  
93 specific eddies to better understand eddy's generation, development and disappearance mechanisms  
94 (Wang et al., 2008; Zhang et al., 2013).

95 As shown above, the dynamic processes and relative mechanisms are very complex, but still not cleared  
96 until now in the SCS. It will be much more difficult to predict the future status of the ~~future~~ ocean.  
97 National Marine Environmental Forecasting Center (NMEFC) is mainly responsible for the prediction of  
98 ~~the sea area of~~ the South China Sea, and has built a SCS Operational Forecasting System (SCSOFS). As  
99 is known to all, the open boundary forcing conditions plays an important role in the numerical prediction

100 of the regional ocean. Due to the various limitations, the current SCSOFS' open boundary conditions  
101 (OBC) are derived from the Simple Ocean Data Assimilation (SODA, [Carton and Giese, 2008](#))  
102 climatological monthly mean during the forecast run. It is extremely inappropriate for the real-time ocean  
103 prediction system, so we [are planning](#) to ~~generate~~[transform](#) the OBC from ~~SODA~~ to the real-time  
104 forecasting results derived from Mercator Océan (MO) [to replace SODA](#) on the next step, in order to  
105 further improve prediction accuracy of the SCSOFS. Before carrying out this work, it is necessary to  
106 compare and validate the performance of MO in the SCS.

107 ~~The focusing of T~~his paper ~~focuses will be the~~ comparison and validation of the performances of MO and  
108 SCSOFS in the SCS, based on the observation data we have got in 2012. The rest of this paper is  
109 organized as follows. Section 2 gives the introductions to the observed data which are employed to  
110 validate the systems, and the configurations of MO and SCSOFS. Section 3 shows the results of  
111 comparison and validation and discussions. Section 4 presents the summary and conclusions.

## 112 **2 Observed data and numerical operational systems**

### 113 **2.1 Satellite data**

114 The Map of Sea Level Anomaly (MSLA) and Map of Absolute Dynamic Topography (MADT) data, ~~also~~  
115 with the [derived](#) relative Geostrophic Velocity Anomaly (GVA) and Absolute Geostrophic Velocity  
116 (AGV) data ~~derived~~ from them, ~~respectively~~, are used to analysis the mesoscale eddy in the SCS and  
117 compare with the numerical simulations. They are all-sat-merged and gridded delayed-time altimeter  
118 product produced by SSALTO/DUACS and distributed by Aviso in April 2014, with support from  
119 Centre National D'études Spatiales (Cnes, [www.aviso.altimetry.fr](http://www.aviso.altimetry.fr)). The products are [directly](#)  
120 ~~computed~~[sampled](#) on a  $0.25^{\circ} \times 0.25^{\circ}$  [spatial](#) resolution Cartesian grid in both longitude and latitude ~~from~~  
121 ~~the Mercator gridded product~~, with a daily temporal resolution. Its period covers from 1993 to present,  
122 and the period of reference has been changed from 7 years (1993-1999) to 20 years (1993-2012). It has  
123 been corrected for instrumental errors, environmental perturbations, the ocean sea state influence, the  
124 tide influence, atmospheric pressure and multi-mission cross-calibration (CLS, 2015).

125 Two kinds of Sea Surface Temperature (SST) data ~~are will be~~ used in this paper. One is derived from the  
126 merged satellite's [infrared sensors \(AVHRR/NOAA\) and microwave/AVHRR, sensor](#)  
127 [\(AMSR-E/AQUAMetOp/AVHRR, GCOMW1/AMSR2, Coriolis/WINDSAT\)](#), and *in-situ* [SST \(buoy](#)

128 ~~and ship~~ data Global Daily SST (MGDSST), with a  $0.25^{\circ} \times 0.25^{\circ}$  horizontal resolution, which is  
129 analyzed and published ~~at the Office of Marine Prediction of the~~ Japan Meteorological Agency  
130 (JMA). The data can be obtained from <http://near-goos1.jodc.go.jp/>.

131 The other one is derived from the NOAA  $0.25^{\circ} \times 0.25^{\circ}$  daily Optimum Interpolation Sea Surface  
132 Temperature (OISST), which is an analysis constructed by combining observations from different  
133 platforms, such as satellites, ships, buoys, on a regular grid via optimum interpolation. Right now,  
134 National Centers for Environmental Information (NCEI) provides two kinds of OISST: one uses infrared  
135 satellite data from the Advanced Very High Resolution Radiometer (AVHRR) named as AVHRR-only,  
136 and the other one uses AVHRR data along with microwave data from the Advanced Microwave  
137 Scanning Radiometer (AMSR) on the Earth Observing System Aqua or AMSR-E satellite named as  
138 AVHRR+AMSR. ~~Since the production of the AVHRR+AMSR data ended in 2011, t~~The first one,  
139 AVHRR-only, is used in this study, which spans 1981 to the present and can be downloaded from the  
140 website <http://www.ncdc.noaa.gov/oisst/data-access>.

## 141 **2.2 In-situ data**

142 The *in-situ* data employed in this paper for the comparison and validation of both systems are provided  
143 by the South China Sea Institute of Oceanology, Chinese Academy of Sciences. There were one mooring  
144 to measure the sea water velocity and 5 cruises ~~conducted~~implemented to measure the temperature and  
145 salinity (TS) in the SCS during 2012.

146 The mooring station is located at Maoming (Fig. 1), where bottom-mounted upward-looking 75 kHz  
147 Acoustic Doppler Current Profilers (ADCPs) ~~were~~are deployed to monitor the current profile (U  
148 component and V component) from the depth of 2\_m to 48\_m with a 2-m interval in vertical. The period of  
149 the monitoring is from 11 July to 8 October, in 2012, with a temporal interval 10 min. Firstly, the  
150 ~~outlier~~abnormal data are eliminated from the original measured data; ~~in the secondly~~, a low-pass filter  
151 with 25-hour is applied to ~~remove~~filter out the tidal currents; and ~~daily mean currents are calculated using~~  
152 a 25-hour average ~~is calculated to get the daily average data, which were used in order~~ to compare and  
153 validate with the simulated results of MO and SCSOFS.

154 The TS data from ~~the five~~5 cruises ~~were~~are measured by SeaBird 19 plus  
155 conductivity-temperature-depth (CTD) with 1-m resolution in vertical. Among the ~~five~~5 cruises, one is  
156 the Qiongdong cruise in the NSCS, which was conducted ~~for~~9 days from 12 to 20 July at 90 stations

157 along 6 sections (~~s~~See Fig.1); another one is the Nansha cruise around the Nansha Islands, which was  
158 conducted ~~for~~ 5 days from 24 to 28 August at 17 stations along 10°N section from 109.5°E to 117.5°E.  
159 The TS data from those two cruises will be used to compare and validate the TS distribution from MO  
160 and SCSOFS in vertical and horizontal. ~~All the measured~~The TS data ~~collected~~ from ~~all the 5~~ cruises  
161 will be ~~used~~~~collected~~ to ~~perform a correlation analysis of each of the simulated predictions of~~ ~~compare~~  
162 ~~with the simulated data from~~ MO and SCSOFS ~~models with the observations~~~~via correlation analysis~~.

### 163 2.3 The configurations of SCSOFS

164 The SCSOFS ~~uses~~~~is build up based on~~ the Regional Oceanic Modelling System (ROMS), which is a  
165 three-dimensional, non-linear primitive equations, free surface, hydrostatic, split-explicit,  
166 topography-following-coordinate in vertical and orthogonal curvilinear in horizontal on a staggered  
167 Arakawa C-grid (~~Arakawa and Lamb, 1977~~) oceanic model (Shchepetkin and McWilliams, 2005).

168 To avoid the influences of boundary to the circulations in the SCS, the model's boundaries was extended  
169 to southward and eastward, then the model covered a larger domain (4.5°S to 28.3°N, 99°E to 145°E, Fig.  
170 1) than the SCS. The horizontal resolution variates from 1/12° in the south and east boundary to 1/30° in  
171 the SCS. There were 36 s-coordinate levels in the vertical with the thinnest layer being 0.16 m on the  
172 surface. The bathymetry was extracted from the ETOPO1 data sets published by U.S. National  
173 Geophysical Data Center (NGDC), which is a global relief model of Earth's surface that integrates ocean  
174 bathymetry and land topography, with 1 arc-minute resolution (Amante and Eakins, 2009). The ETOPO1  
175 ~~dataset~~ has combined the satellite altimeter observations, shipping load sonar measurement, multi  
176 resolutions digital terrain database and the global digital terrain model and many other ~~data~~ sources, and  
177 ~~it has~~ been used in the global and regional oceanic models widely. And the original ~~ETOPO1~~ bathymetry  
178 was revised in the area of ~~near~~~~next to~~ the coast of China mainland according to the *in-situ* data ~~collected~~  
179 ~~in NMEFC~~~~measured by our group~~, then smoothed according to Shapiro (1975). The maximum depth was  
180 set to be 6000 m and the minimum depth to be 10 m in the model (Wang, 1996).

181 The initial temperature and salinity ~~conditions~~ were derived from the climatology monthly mean ~~Simple~~  
182 ~~Ocean Data Assimilation~~ (SODA, ~~Carton and Giese, 2008~~) in January. However, the initial velocities  
183 and elevation were set to zero, which means to integrate the model from a static status. The model's  
184 western lateral boundary was treated as a wall. The other three (northern, southern, eastern) lateral  
185 boundaries were opened, whose temperature, salinity, velocity, and elevation were prescribed by spatial

186 interpolation of the monthly mean SODA dataset. The 2D and 3D velocities, through the open  
187 boundaries, are modulated to guarantee the conservation of volume flux in the whole model domain. In  
188 addition, the nudging technology was used for 3D velocity, temperature, and salinity to the three open  
189 lateral boundaries with a 30-day time scale for outflow and 3-day for inflow.

190 The model is forced using 6-hourly wind stress, net fresh water fluxes, net heat fluxes, surface solar  
191 shortwave radiation at surface from NCEP\_Reanalysis 2 data provided by the NOAA/OAR/ESRL PSD,  
192 Boulder, Colorado, USA, [accessible](http://www.esrl.noaa.gov/psd/) from the web site at <http://www.esrl.noaa.gov/psd/> (Kanamitsu et  
193 al., 2002). In order to get more reasonable simulated SST, the kinematic surface net heat flux sensitivity  
194 to SST ( $dQ/dSST$ ) is used to introduce thermal feedback to correct net surface heat flux (Barnier et al.,  
195 1995) with a constant number  $-30 \text{ W/m}^2/^{\circ}\text{C}$  in the whole domain. The MGDSST data is used to correct  
196 net surface heat flux. In addition, the monthly mean climatology discharges of the Mekong River and the  
197 Pearl River are prescribed to the model.

198 The system was run with 6 seconds time step for the external mode, and 180 seconds for the internal  
199 mode under the initial conditions, boundary conditions and surface forcing mentioned in above. The  
200 system was conducted a hindcast run from 2000 to 2011 after a 15 years climatology run for spin-up  
201 (Wang et al., 2012). The model results ~~were~~ archived to the snapshot with a 5-day interval, which  
202 ~~were~~ used as the ensemble members for the EnOI (Ensemble Optimal Interpolation) method  
203 assimilation. After the hindcast run, the system was conducted an assimilation run in 2012 with EnOI  
204 method, the along track SLA data from AVISO had been assimilated as the observations with a 7-day  
205 time window. The details on the EnOI applied in the SCSOFS can be referred as Ji et al. (2015). The  
206 assimilated results ~~were~~ archived to daily mean with a 1-day interval in 2012, which ~~were~~ used  
207 to compare and validate in this paper. Then the system is implemented into operations in NMEFC  
208 since January 1st, 2013. It runs on daily bases for 6 days simulations (1-day nowcast and 5-day forecast)  
209 to, and provides 120-hour forecasting products, ~~which including of the three dimensional 3D~~ ocean  
210 temperature, salinity and currents with 24 hours interval.

## 211 **2.4 The configurations of MO**

212 The high resolution global analysis and forecasting system PSY4V1R3 was operational as the V2 of the  
213 MyOcean project from February 2011 up to April 2013, when it was replaced by the PSY4V2R2 system.



214 During this period, PSY4V1R3 has been producing weekly 14-day hindcasts and daily 7-day forecasts.

215 The PSY4V1R3 configuration described as followed is indicated for as MO model through this paper.

216 The model configuration of PSY4V1R3 is based on a tripolar ORCA grid type (Madec and Imbard, 1996)

217 in the NEMO 1.09 version with a  $1/12^\circ$  horizontal resolution which means 9 km at the Equator, 7 km at

218 mid latitudes and 2km toward the Ross and Weddel Sea. The grid cells follow an Arakawa C-grid type

219 (~~Arakawa and Lamb, 1977~~). The 50-level vertical discretization retained in this system has 1m resolution

220 at the surface, decreasing to 450\_m at the bottom and 22 levels within the upper 100\_m. “Partial cell”

221 parametrization was chosen for a better representation of the topographic floor (Barnier et al., 2006). The

222 high frequency gravity waves are filtered out by the free surface formulation of Roullet and Madec

223 (2000).

224 For the diffusion, a horizontal bilaplacian was added along the equator ( $20\text{ m}^2\text{s}^{-1}$ ) and two laplacians in

225 the Canadian straits (up to  $100\text{ m}^2\text{s}^{-1}$ ). Laplacian lateral isopycnal diffusion was added on tracers ( $125$

226  $\text{m}^2\text{s}^{-1}$ ) and a horizontal biharmonic viscosity was added for the momentum ( $-1\times 10^{10}\text{ m}^4\text{s}^{-1}$  at the

227 Equator and decreasing poleward as the cube of the grid size). In addition, the vertical mixing is

228 parameterized according to a turbulent closure model (TKE order 1.5) adapted by Blanke and Delecluse

229 (1993), the lateral friction condition is a partial-slip condition with a regionalization for the

230 Mediterranean Sea, Indonesian region, Canadian straits and Cape Horn. The atmospheric fields are taken

231 from the ECMWF (European Centre for Medium Range Weather Forecasts) Integrated Forecast System

232 at a daily average frequency. Momentum and heat turbulent surface fluxes are computed from CLIO bulk

233 formulae (Goosse et al., 2001). ~~We use a~~ viscous-plastic rheology formulation is used for the LIM2\_VP

234 ice model (Fichefet and Maqueda, 1997, LIM2\_VP in Hunke and Dukowicz 1997;). A multivariate data

235 assimilation (Kalman Filter kernel with SEEK formulation , Pham et al., 1998) of *in-situ* T and S (from

236 Coriolis/Ifremer), along-track MSLA (from AVISO, with MDT from Rio and Hernandez, 2004) and

237 intermediate resolution SST (~~0.25°×0.251/4°~~ SST product RTG from NOAA) is performed with the

238 SAM2 software (Lellouche et al., 2013). An Incremental Analysis Update (IAU) centered on the 4th day

239 of the 7-day assimilation window ensures a smooth correction of T, S, U, V and SSH (Sea Surface

240 Height). The assimilation cycle consists of a first 7-day simulation called guess or forecast, at the end of

241 which the analysis takes place. The IAU correction is then computed and the model is re-run on the same

242 week, progressively adding the correction. The increment is distributed in time with a Gaussian shape

243 which is centered on the 4th day. More details on the SAM2 software (applied on other model

244 configurations) can be found in Lellouche et al. (2013) except that no large scale bias correction is  
245 applied in PSY4V1R3. Concerning the initial conditions, the PSY4V1R3 was started in April 2009 from  
246 a 3D climatology of temperature and salinity (WOA2005, [Antonov et al., 2006](#); [Locarnini et al., 2006](#)).

## 247 **3 Comparisons, validations and discussion**

### 248 **3.1 Velocities**

#### 249 **3.1.1 Absolute Geostrophic Velocity**

250 Figure 2 shows the distributions of the monthly AGV composited with ~~Sea Surface Height (SSH)~~ from  
251 AVISO, MO, and SCSOFS in January, April, July, and October of 2012, respectively. Here we use the  
252 January, April, July, and October represent winter, spring, summer, and autumn, respectively. It is  
253 valuable to note that the AGV of MO and SCSOFS are not the velocities output from the numerical  
254 model directive. However, in order to better comparison, they are recalculated according to SSH from the  
255 model output on every day and assuming geostrophic balance following Eq. (1):

$$256 \quad u = -\frac{g}{f} \frac{\partial SSH}{\partial y} \quad v = \frac{g}{f} \frac{\partial SSH}{\partial x} \quad (1)$$

257 where  $g$  is gravitation acceleration,  $f$  is the Coriolis parameter,  $x$ ,  $y$  are the east, north axis;  $u$ ,  $v$  are the  
258 eastward, northward velocity components in horizontal, respectively.

259 ~~Comparisons~~ ~~By comparing of the observations of AVISO with the results from MO and SCSOFS shows~~  
260 ~~that~~, both MO and SCSOFS can catch the main basin-scale oceanic circulation pattern in the SCS, and  
261 show that a cyclonic gyre in winter and an anti-cyclonic gyre in summer, which being well accordance  
262 with the pattern of AVISO, ~~except that the current speeds are a little stronger than AVISO~~. It is worth to  
263 mention that the result of MO is in good well agreement with the AVSIO in January, such as the  
264 southward western boundary currents along the eastern coast of Vietnam, the LCC, the anti-cyclonic  
265 eddy in the western of the LUS around (118°E, 21°N), the cyclonic eddy in the eastern of the Vietnam  
266 around (113°E, 15°N). However, the result of SCSOFS is much smoother without obvious mesoscale or  
267 small scale circulations, or they are very weaker (0.2-0.4 m s<sup>-1</sup>) than those (0.6-0.8 m s<sup>-1</sup>) of AVISO or  
268 MO. The circulation is chaos in spring in the SCS, though the circulation pattern of MO is in better  
269 agreement with the one of AVISO than the one from SCSOFS. ~~All the three results show~~ Tthe  
270 anti-cyclonic eddy around (111°E, 10°N) and the western boundary jet in the southeast of the Vietnam in  
271 summer, with the maximum speed being about 1.0 m s<sup>-1</sup>, 0.9 m s<sup>-1</sup>, and 0.7 m s<sup>-1</sup> are shown for by AVISO,

272 MO, SCSOFS, respectively. The westward intensification along the eastern coast of the Vietnam is  
273 more obvious in autumn than other three seasons, and the maximum speed is larger than  $1.0 \text{ m s}^{-1}$   
274 for MO and SCSOFS, but is about  $0.7 \text{ m s}^{-1}$  for AVISO.

275 As mentioned in Sect. 1, the Kuroshio intruding the SCS through the LUS has been distinguished by  
276 three types as the looping path, the leaking path and the leaping path, according to Nan et al. (2011a). All  
277 three results show the looping path in winter, the leaping path in summer and leaking path in autumn,  
278 which is well consistent with the model results showed by Wu and Chiang (2007). However,  
279 AVISO, MO, and SCSOFS show the leaking path, looping path, and leaping path in spring, respectively.

### 280 3.1.2 Time series from mooring station

281 Figure 3 shows the comparison of the daily mean time series of the  $u$ ,  $v$  components from the mooring,  
282 MO, and SCSOFS at the 40m-depth layer at the Maoming station (See Fig. 1) from July 11 to October 8,  
283 2012. Both MO and SCSOFS can capture the similar variation trends of the time series with the  
284 mooring observation. Especially, MO results match the observed current variations well  
285 for both  $u$ - and  $v$ - component, during the period of the Typhoon Kai-tak on 17 August 2012. Although  
286 SCSOFS shows the larger velocity during the Typhoon Kai-tak, the maximum velocity range is  
287 less than the observation and anticipating leading the observation about 1 day. The root mean square  
288 errors (RMSE) between observations and models of MO and SCSOFS are  $0.075 \text{ m s}^{-1}$ ,  
289  $0.094 \text{ m s}^{-1}$  for  $u$ -component,  $0.062 \text{ m s}^{-1}$ ,  $0.084 \text{ m s}^{-1}$  for  $v$ -component, respectively. Overall, MO results  
290 are in better agreement with the observations than those of SCSOFS. However, SCSOFS results have a  
291 temporal phase bias (phase shift) comparing with the observation, which is leading the observations about  
292 1 day.

## 293 3.2 Temperature and Salinity

### 294 3.2.1 SST

295 SST is a very important prognostic variable in a hydrostatic ocean general circulation numerical model,  
296 which plays a key role to the ocean circulations and the air-sea interaction. So SST error is a crucial  
297 criteria of the numerical model skill, especially for an operational ocean circulation model. In fact, the  
298 SST simulation error is affected by several factors, for example the limitation of physical model, the  
299 surface atmospheric forcing conditions, the bias of initial field and the uncertainty from the open

300 boundary, as pointed out by Ji et al. (2015). Although the SST data have been assimilated into both MO  
301 and SCSOFS, the assimilated SST still has some errors for both systems.

302 Figure 4 shows the distributions of the monthly mean SST errors between two systems and MGDSST in  
303 the SCS in 2012. The errors show an obvious regional distribution, the ~~larger~~<sup>bigger</sup> errors mainly  
304 ~~appear~~<sup>exist</sup> in the coastal regions for the depth shallower than 200 m, such as in the TWS, the eastern of  
305 the Guangdong province in January, the gulf of Tonkin in July. ~~What's more,~~<sup>T</sup>the strong seasonal  
306 variations for ~~the basin-averaged~~ SST error ~~can~~ also ~~can~~ be found, which is larger in winter and smaller in  
307 summer, ~~from~~ both systems. Comparing with MGDSST, the maximum, minimum, and mean ~~for the~~  
308 ~~basin-averaged 12~~ monthly RMSEs are 0.78\_°C, 0.37\_°C, 0.51\_°C for the MO, 1.15\_°C, 0.56\_°C, 0.86\_°C  
309 for the SCSOFS, respectively, in the SCS. Based on the Fig. 4, ~~MO performed better than SCSOFS in~~  
310 ~~simulating the simulated~~ SST ~~performance of MO is better than those of SCSOFS~~ by comparing with  
311 MGDSST.

### 312 3.2.2 Horizontal and vertical distribution of TS

313 ~~TS~~<sup>The</sup> horizontal distributions ~~at~~<sup>a</sup> 10-m depth layer ~~TS~~ in the eastern of Hainan island from the *in-situ*  
314 ~~observations~~ of Qiongdong cruise, ~~model results from~~ MO, and SCSOFS, ~~respectively~~, are shown in Fig.  
315 5. Two clear cold and salty water cores located at the eastern of Hainan island, which ~~are located~~<sup>being at</sup>  
316 about (110.75°E, 19.2°N) and (111.3°E, 19.7°N), are shown in both *in-situ* ~~observations~~ and SCSOFS  
317 (Fig. 5) ~~with, except that~~ the ~~cores from~~ SCSOFS being more saline than ~~the in-situ observations~~. It can  
318 be easily deduced that the two cores are produced by upwelling process from the TS vertical distributions  
319 of the section K, F, H, and G (Jing et al., 2015).

320 Figure 6 shows the vertical TS distributions from the *in-situ* ~~observations~~ of Qiongdong cruise, ~~model~~  
321 ~~results from~~ MO and SCSOFS, along section E. Both systems have ~~gotten~~ the ~~same~~<sup>similar</sup> vertical  
322 structures of TS with the *in-situ* ~~observations~~. All of them ~~demonstrated~~<sup>show out</sup> the obvious upwelling  
323 systems, with cold and salty waters flowing from offshore to nearshore along the bottom. All three results  
324 show the upper mixing layer depth is about 15\_m, ~~with~~ <sup>T</sup>the sea water ~~is~~ well mixed above 15\_m depth  
325 and the isotherms and isohalines are almost vertical, ~~where,~~ ~~indicating~~ strong vertical stratification ~~is~~  
326 ~~shown~~ in summer. The diluted water is flushing from the nearshore to offshore, with the 33-isohaline  
327 ~~cross with the sea surface located~~ at ~~the position of~~ about 50\_km ~~from the coast~~ for both *in-situ*

328 [observations](#) and SCISOFS, but at [the position of](#) about 420 km for MO. In above, it is indicated that the  
329 results of SCISOFS is better agreement with the *in-situ* [observations](#) than those of MO.  
330 The vertical distributions of TS from the *in-situ* [observations](#) of Nansha cruise, [and model results from](#)  
331 MO, and SCISOFS along the 10°N section are shown in Fig.7 for the layer [of depth shallower than above](#)  
332 300\_m and Fig.8 for the layer of [depth from 300- m to 1200\\_m](#). Both systems have got almost the same  
333 vertical structures with the *in-situ*, especially for the upper mixing layer depth about 70\_m ~~are~~ shown in  
334 the three results. ~~Water~~The temperature almost linearly decreases from 28\_°C to 3\_°C with the depth [going](#)  
335 [deep increasing](#) from the bottom of the upper mixing layer to ~~the~~ 1200\_m depth. However, ~~the~~ salinity  
336 increases from 33.5 [psu](#) to 34.5 [psu](#) with the depth [going deep increasing](#) from the bottom of the upper  
337 mixing layer to about 200m depth, and keeps [almost constant at](#) 34.5 [psu](#) from 200\_m to 300\_m ~~depth~~.  
338 Then a fresher water layer exists in the middle layer from about 400\_m to 700\_m with the salinity about  
339 34.4 [psu](#). Below the middle layer, the salinity again increases from 34.4 to 34.58 with the depth  
340 increasing from 700\_m to 1200\_m. It indicates that the results of MO and SCISOFS are [in good well](#)  
341 agreement with *in-situ* [observations](#), except that the salinity of the fresh water in the middle layer from  
342 MO is less than 34.4 [which and is](#) fresher than those of *in-situ* and SCISOFS, but the thickness of the [fresh](#)  
343 layer is thicker than those of *in-situ* and SCISOFS.

### 344 3.2.3 Correlation ~~analysis~~ship between model and *in-situ*

345 In order to better compare and validate the performances of the two systems, we collected all the  
346 measured TS data from five cruises in the SCS in 2012 to conduct a comprehensive correlation analysis.  
347 Figure 9 shows the comparison ~~of relativity~~ of TS between [the model results from](#) MO ~~and~~, SCISOFS and  
348 [the in-situ observation](#) by scatter points, respectively. ~~Each~~Any point in the Fig.9 ~~is~~ corresponds ~~ed~~  
349 two values of temperature or salinity, one is from the *in-situ* [observation](#) along X axis, and the other one  
350 is from [the model results from](#) MO or SCISOFS along Y axis. The correlation coefficients of temperature  
351 are 0.987, 0.982, and of salinity are 0.717, 0.897, between MO, SCISOFS and *in-situ*, over the 95%  
352 significance level, respectively, which [is](#) showing the good relativity between MO, SCISOFS and *in-situ*.  
353 It also indicates that the relativity of temperature is [in](#) better agreement with *in-situ* than those of salinity  
354 for both MO and SCISOFS, and SCISOFS is [in](#) better agreement with *in-situ* than MO for salinity.

### 355 3.3 Mesoscale activities

#### 356 3.3.1 SST front

357 Oceanic front is a good indicator for connection between water masses with different hydrological  
358 features, which is an important marine mesoscale phenomenon. There are numerous SST fronts in the  
359 SCS, most of them located on the continental shelf with the depth below 200\_m or aligned with the shelf  
360 break, especially in the NSCS. A few ~~obviousevident~~ SST fronts have been identified from the long-term  
361 NOAA/NASA Pathfinder SST data, namely: Fujian-Guangdong Coastal Front, Pear River Estuary  
362 Coastal Front, Taiwan Bank Front, Kuroshio Intrusion Front, Hainan Island East Coastal Front, Tonkin  
363 Gulf Coastal Front (Wang et al., 2001). All of them exhibit very strong seasonal variability, which is  
364 mainly due to the EAM (Belkin and Cornillon, 2003).

365 Figure 10 shows the distributions of SST fronts from the model results from MO and SCSOFS ~~infer~~ four  
366 seasons. The similar frontal patterns with their evident seasonal variations are shown in both systems,  
367 except for ~~some~~ small differences. In winter, most fronts reach maximum strength ( $>0.2$  °C/km). The  
368 Fujian-Guangdong ~~C~~oastal ~~F~~ront and Taiwan Bank ~~f~~ront are major fronts in the SCS which is in  
369 agreement with previous satellite results from Wang et al. (2001). These two fronts merge and extend to  
370 Pearl River Estuary and the Hainan Island. The Hainan Island East Coastal Front is stronger in MO than  
371 in SCSOFS, whereas the Tonkin Gulf Coastal Front is stronger in SCSOFS than in MO. ~~In SCSOFS,~~  
372 ~~the~~ Kuroshio Intrusion front is obvious in SCSOFS, however, ~~it~~~~which~~ is hardly seen in MO. In spring,  
373 most fronts become weak obviously due to the weakening of ~~northeast~~er monsoon ~~from~~ both  
374 operational systems, except that the Hainan West Coastal ~~f~~ront emerges in SCSOFS. In summer,  
375 weakening almost occurs in all the fronts mentioned above for SCSOFS, which is in good agreement  
376 with the results of Wang et al. (2001). However, disappearing occurs in all the fronts for MO. In fall,  
377 most fronts fade and disappear, except that the Taiwan Bank front has very weak strength compared to  
378 other seasons for both systems. Both systems have not shown the Kuroshio Intrusion Front identified by  
379 Wang et al. (2001) in summer and fall.

#### 380 3.3.2 The Typhoon Tembin

381 There are a lot of typhoons in the SCS during the typhoon season in every year, so that the typhoon  
382 activities are very frequent in the SCS, especially in 2012. One important~~the~~ study on the air-sea  
383 interaction is the responding of the physical ocean dynamics to typhoon in the oceanic upper layer. One

384 important responding is the decreasing of SST due to the strong vertical mixing caused by typhoon (Price  
385 et al., 1994). According to the SST observations from the satellite, SST usually decreases 2-5 °C due to  
386 typhoon passing (Cione and Uhlhorn, 2003; D'Asaro et al., 2007; Wu et al., 2008; Jiang et al., 2009).  
387 Dare and McBride (2011) ~~studied~~~~researched~~ the response of SST to the global typhoons during  
388 1981~2008 and indicated that the maximum decreasing of SST usually occurred in 1-day after typhoon  
389 passing.

390 In this section, we select~~ed~~ the typhoon Tembin as an example to validate the MO and SCSOFS model  
391 skills for the SST simulations. As shown in Fig. 11, the typhoon Tembin ~~passed~~~~went~~ through and made a  
392 perfect turn ~~around~~ in the NSCS from 25 to 28 August 2012. From the three results, we can find the  
393 obvious decreasing of SST 1-day after typhoon passing, which is about 2-4 °C and in good well  
394 correspondence with previous studies mentioned in above. SCSOFS is in much better agreement with  
395 OISST than MO, especially on 26 and 27 August 2012, not only for the range of SST decreasing, but also  
396 for the domain of SST ~~decrease~~~~ing~~.

### 397 3.3.3 Mesoscale eddy

398 Mesoscale eddies cannot be identified and extracted from geophysical turbulent flow as observed by  
399 satellite altimetry without suitable definition and a competitive identification algorithm. A  
400 number~~multitude~~[ZA1] of different techniques for automatic identification of eddies have been proposed  
401 based either on physical or geometric criteria of the flow field. In this study, a free-threshold eddy  
402 identification algorithm with the SLA data is employed. This algorithm is based on the vector geometry  
403 method and Okubo-Weiss method (Okubo, 1970; Weiss, 1991) with six constraints applied to the SLA to  
404 detect an eddy: (1) a vorticity-dominated region at the eddy center ( $W < 0$ , here W is the Okubo-Weiss  
405 parameter, for its definition referred as Xiu et al.(2010)) must exist; (2) the SLA magnitude has a local  
406 extreme value (minimum or maximum); (3) closed contours of SLA around the eddy center must exist; (4)  
407 the eddy radius must be larger than 45km.(5)the eddy amplitude must be larger than 4cm. In this study,  
408 the amplitude is defined as the absolute value of the SLA difference between the eddy center and the SLA  
409 along the eddy edge. The Eddy-tracking method used is the one developed by Chaigneau et al. (2008),  
410 and we only keep eddies with life span not less than 28 days. Eddies were analyzed and compared based  
411 on MO, AVISO and SCSOFS in 2012. The numbers of eddies for three types of data were in Table 1,  
412 cyclones and anti-cyclones were counted separately and seasonally.

413 The spatial distribution of eddy ~~originbirthplace~~ is shown in Fig 12. MO has more eddies formed,  
414 especially more anti-cyclones formed than those ~~in~~ AVISO, most of the excessive eddy cores were  
415 found near the middle of SCS. SCSOFS has more anti-cyclones as well and less cyclones than AVISO.  
416 Both MO and SCSOFS show excessive eddies formed in the middle of the basin and less eddies in the  
417 western of the east of Vietnam. The SLA of SCSOFS and MO is calculated simply by subtracting mean  
418 SSH (~~21~~4 years mean for SCSOFS and only one-year mean for MO) instead of a uniformed Mean Sea  
419 Surface, which might cause the excessive anti-cyclones in both models. Observations of AVISO, and  
420 model results from MO and SCSOFS~~All three types of data show agree~~ that less eddies formed in the  
421 middle part of NSCS.

422 As for the seasonal distributions (figures not shown), all three data have most eddies in spring ~~and~~ ~~lest in~~  
423 ~~fall~~. Both AVISO and SCSOFS have lest eddies in fall, and more cyclones than anti-cyclones in spring  
424 and fall, and all three have less cyclones than anti-cyclones in summer. SCSOFS differs with AVISO  
425 mainly in winter while they agree reasonably in the other three seasons. MO has surplus eddies counted  
426 in every season especially for anti-cyclones, which might be causes of the errors introduced by the  
427 simplified calculation of SLA.

#### 428 **4 Conclusions**

429 Two operational ocean analysis and forecasting systems, MO and SCSOFS, have been built based on the  
430 state-of-the-art hydrodynamic ocean model in France and China, respectively. This paper demonstrated  
431 the results of comparison and validation for the performance of both systems on the ocean circulation, the  
432 structures of the TS, and mesoscale activities in the SCS, based on the observed satellite and *in-situ* data  
433 in 2012, ~~are shown in this paper~~. The comprehensive performances for the both systems are summarized  
434 as follow.

435 Both systems have capabilities to simulate~~enough~~ the main basin-scale circulations in the SCS and model  
436 results are in good~~been well~~ agreement with the result of AVISO data. And MO has better performance  
437 than SCSOFS in simulating~~the results of MO are better agreement with those of AVISO than those of~~  
438 ~~SCSOFS for~~ several main branches of the SCS ocean circulations and eddies in January. SCSOFS did not  
439 generate~~There are no~~ many mesoscale or small scale circulations ~~shown in SCSOFS~~, which may be  
440 caused by~~of~~ a little strong horizontal mixing set in the model. The westward intensification in the eastern



441 coast of the Vietnam is ~~the most~~ strongest in autumn among the four seasons. For the type of the Kuroshio  
442 intruding the SCS, the [AVISO observations, and model three](#) results ~~from both MO and SCSOFS~~ show  
443 the looping path in winter, the leaping path in summer and leaking path in autumn. However, the leaking  
444 path, looping path and leaping path are shown for AVISO, MO and SCSOFS in spring, ~~respectively~~.

445 Both systems ~~demonstrated get~~ the ~~similar~~ame variation ~~trends in of the u and v-~~ components time series  
446 with the mooring observation. The RMSE between MO, SCSOFS and mooring observation are 0.075  
447 m/s, 0.094 m/s for u-component, 0.062 m/s, 0.084 m/s for v-component, respectively. The results of MO  
448 are ~~in~~ better agreement with the observation than those of SCSOFS, especially during the period of the  
449 Typhoon Kai-tak.

450 The maximum, minimum, and mean ~~for the basin-averaged 12~~ monthly RMSEs between MO and  
451 MGDSST are 0.78 °C, 0.37 °C, 0.51 °C, between SCSOFS and MGDSST are 1.15 °C, 0.56 °C, 0.86 °C  
452 ~~for the SCSOFS~~ in the SCS, respectively. For the horizontal and vertical distributions of TS, both  
453 systems have ~~achieved get~~ the same structures with the *in-situ* data, but the results of SCSOFS are ~~in~~  
454 better agreement with the *in-situ* ~~observations~~ than those of MO. The correlation coefficients ~~of~~  
455 ~~temperature~~ are 0.987 ~~and~~; 0.982 ~~for temperature, and of salinity are~~ 0.717 ~~and~~; 0.897 ~~for salinity~~,  
456 between ~~model results from~~ MO ~~and~~; SCSOFS and *in-situ* data, over the 95% significance level,  
457 respectively. It indicates that the good relativity between MO, SCSOFS and ~~the in-situ observations~~, the  
458 relativity of temperature is better agreement with *in-situ* data than those of salinity for both ~~model results~~  
459 ~~from~~ MO and SCSOFS, and ~~the result from~~ SCSOFS is better agreement with *in-situ* data than MO for  
460 salinity.

461 The similar SST frontal patterns with their evident seasonal variations are shown in both systems. Most  
462 fronts achieve maximum strength in winter, become weak obviously due to the weakening of northeaster  
463 monsoon EAM in spring and summer, fade and disappear in autumn, ~~which~~—It is ~~consistent well~~  
464 ~~agreement~~ with the result of Wang et al. (2001).

465 During the typhoon Tembin in the NSCS, the obviously decreasing of SST about 2-4 °C occurs 1-day  
466 after typhoon passing shown in the results of MO, SCSOFS and OISST, which is ~~consistent well~~  
467 ~~agreement~~ with previous studies. SCSOFS is ~~in~~ much better agreement with OISST than MO ~~both~~ for  
468 ~~both the~~ range and domain of SST decreasing.

469 MO has more eddies formed near the middle of SCS than AVISO, especially for anti-cyclones. SCSOFS  
470 has more anti-cyclones ~~as well~~, but less cyclones than AVISO. [AVISO data and model results from](#)

471 ~~MNO and SCSOFS a~~All ~~three data show~~have most eddies in spring and lest in fall, and less cyclones than  
472 anti-cyclones in summer. Both AVISO and SCSOFS have more cyclones than anti-cyclones in spring  
473 and fall.

474 In order to improve ~~their performances~~ of MO and SCSOFS ~~further~~ in the SCS in future based on the  
475 results of, according to the comparison and validation for the two systems, ~~MO and SCSOFS, we would~~  
476 ~~like to propose some suggestions to modify the systems.~~some recommendations are proposed as below:

477 For MO, we would like to suggest (1) to modify the model bathymetry in the coast area for the depth less  
478 than 200m to improve the model performance in shallow water area, such as SST front; (2) to change the  
479 initial conditions of TS to improve the TS vertical structures, especially for the salinity in deep water area;  
480 For SCSOFS, we would like to suggest (1) to weaken horizontal mixing to get more reasonable  
481 mesoscale or small scale circulations; (2) to optimize the data assimilation scheme further to better  
482 assimilate the *in-situ* and satellite data; (3) to replace the surface forcing data with the higher horizontal  
483 or temporal resolution; (4) to replace the boundary conditions from monthly to weekly or daily like, such  
484 ~~as~~ MO. For both systems, we also would like to suggest to try to get and assimilate more observed data  
485 during the typhoon period to catch the typhoon process more exactly.

#### 486 **Author contribution**

487 X. Zhu, H. Wang and G. Liu compared and validated the model results on velocities and TS. C.  
488 Régnier and M. Drévilon build the MO, D. Wang build the SCSOFS. X. Kuang analyzed the model  
489 results on mesoscale eddy. S. Ren analyzed the model results on SST front. Z. Jing provided the *in-situ*  
490 data. X. Zhu prepared the manuscript with contributions from all co-authors.

#### 491 **Acknowledgements**

492 We would like to thank the anonymous reviewers and the Editor, Ivan Federico, for their valuable  
493 contributions that allow us to improve the manuscript substantially. This study is supported by the  
494 National Natural Science Foundation of China under contract No. 41222038, 41376016, 41206023 and  
495 the Strategic Priority Research Program of the Chinese Academy of Sciences Grant No. XDA11020104  
496 03.

497 **References**

- 498 Arakawa, A. and Lamb, V. R.: Computational design of the basic dynamical processes of the UCLA  
499 general circulation model. *Methods of Computational Physics*, 17. New York: Academic Press, 173–265,  
500 1977.
- 501 Amante, C. and Eakins, B.: ETOPO1 1 Arc-Minute Global Relief Model: Procedures, Data Sources and  
502 Analysis. NOAA Technical Memorandum NESDIS NGDC–24. National Geophysical Data Center,  
503 NOAA, doi:10.7289/V5C8276M, 2009.
- 504 [Antonov, J. I., Locarnini, R. A., Boyer, T. P., Mishonov, A. V., and Garcia, H. E.. World Ocean Atlas](#)  
505 [2005, Volume 2: Salinity. S. Levitus, Ed. NOAA Atlas NESDIS 62, U.S. Government Printing Office,](#)  
506 [Washington, D.C., 182 pp. 2006.](#)
- 507 [Barnier, B., Siefridt, L., Marchesiello, P.. Thermal forcing for a global ocean circulation model using a](#)  
508 [three-year climatology of ECMWF analyses. J. Mar. Syst. 6 \(4\), 363–380,](#)  
509 [http://dx.doi.org/10.1016/0924-7963\(94\)00034-9](http://dx.doi.org/10.1016/0924-7963(94)00034-9), 1995.
- 510 Barnier, B., Madec, G., Penduff, T., Molines, J. M., Treguier, A. M., Le Sommer, J., Beckmann, A.,  
511 Biastoch, A., Boning, C., Deng, J., Derval, C., Durand, E., Gulev, S., Remy, E., Talandier, C., Theetten,  
512 S., Maltrud, M., McClean, J., and De Cuevas, B.: Impact of partial steps and momentum advection  
513 schemes in a global circulation model at eddy permitting resolution, *Ocean Dynam.*, 56, 543–567, 2006.
- 514 Belkin, I. and Cornillon, P.: SST fronts of the pacific coastal and marginal seas. *Pacific Oceanogr.*,  
515 1(2):90–113, 2003.
- 516 ~~[Bell, M. J., Schiller, A., Traon, P. Y. Le, Smith, N. R., Dombrowsky, E. and WilmerBecker, K.: An](#)~~  
517 ~~[introduction to GODAE OceanView. Journal of Operational Oceanography, 8, sup1, s2–s11, doi:](#)~~  
518 ~~[10.1080/1755876X.2015.1022041](https://doi.org/10.1080/1755876X.2015.1022041)~~, 2015.
- 519 Blanke, B. and Delecluse, P.: Variability of the tropical Atlantic-Ocean simulated by a general-  
520 circulation model with 2 different mixed-layer physics, *J. Phys. Oceanogr.*, 23, 1363–1388, 1993.
- 521 Cai, S. and Wang, W.: A numerical study on the circulation mechanism in the northeastern South China  
522 Sea and Taiwan Strait. *Tropic Oceanology*, 16(1), 7–15, 1997. (in Chinese with English abstract).
- 523 Carton, J. and Giese, B.: A Reanalysis of Ocean Climate Using Simple Ocean Data Assimilation  
524 (SODA). *Mon. Weath. Rev.*, 136, 2999–3017, doi: 10.1175/2007MWR1978.1, 2008.

525 Caruso, M., Gawarkiewicz, G. and Beardsley, R.: Interannual variability of the Kuroshio intrusion in the  
526 South China Sea. *J. Oceanogr.*, 62(4), 559–575, 2006.

527 Chaigneau, A., Gizolme, A. and Grados, C.: Mesoscale eddies off Peru in altimeter records:  
528 Identification algorithms and eddy spatiotemporal patterns, *Prog. Oceanogr.*, 79, 106–119, 2008.

529 Chao, S., Shaw, P. and Wang, J.: Wind relaxation as a possible cause of the South China Sea Warm  
530 Current. *J. Oceanogr.*, 51(1), 111–132, 1995.

531 Chao, S., Shaw, P. and Wu, S.: Deep water ventilation in the South China Sea. *Deep Sea Res. I*, 43, 445–  
532 466, 1996.

533 Chern, C. and Wang, J.: A numerical study of the summertime flow around the Luzon Strait. *J. Oceanogr.*,  
534 54(1), 53–64, 1998.

535 Chern, C. and Wang, J.: Numerical study of the upper-layer circulation in the South China Sea. *J*  
536 *Oceanogr.*, 59, 11–24, 2003.

537 Chern, C., Jan, S. and Wang, J.: Numerical study of mean flow patterns in the South China Sea and the  
538 Luzon Strait, *Ocean Dynamics*, 60, 1 047–1 059, doi:10.1007/s10236-010-0305-3, 2010.

539 ~~Chu, P. and Fan, C.: A low salinity cool-core cyclonic eddy detected northwest of Luzon during the~~  
540 ~~South China Sea Monsoon Experiment (SCSMEX) in July 1998, *J. Oceanogr.*, 57, 549–563,~~  
541 ~~doi:10.1023/A:1021251519067, 2001.~~

542 Chu, P. and Li, R.: South China Sea Isopycnal-Surface Circulation. *J. Phys. Oceanogr.*, 30, 2420–2438,  
543 2000.

544 Chu, P., Lu, S. and Chen, Y.: A Coastal Air-Ocean Coupled System (CAOCS) evaluated using an  
545 Airborne Expendable Bathythermograph (AXBT) data set, *J. Oceanogr.*, 55, 543–558,  
546 doi:10.1023/A:1007847609139, 1999.

547 Cione, J. and Uhlhorn, E.: Sea surface temperature variability in hurricanes: Implications with respect to  
548 intensity change. *Monthly Weather Review*, 131(8), 1783–1796, 2003.

549 CLS, SSALTO/DUACS User handbook: (M)SLA and (M)ADT Near-Real Time and Delayed Time  
550 Products. CLS-DOS-NT-06-034, Issue 4.4, Nomenclature: SALP-MU-P-EA-21065-CLS, 2015.

551 Dare, R. and McBride, J.: Sea surface temperature response to tropical cyclones. *Monthly Weather*  
552 *Review*, 139(12), 3798–3808, 2011.

553 D’Asaro, E., Sanford, T., Niiler, P., Terrill, E.: Cold wake of hurricane Frances. *Geophys. Res. Lett.*,  
554 34(15), L15609, 2007.

555 Du, Y., Yi, J., Wu, D., He, Z., Wang, D., Liang, F.: Mesoscale oceanic eddies in the South China Sea  
556 from 1992 to 2012: evolution processes and statistical analysis. *Acta Oceanologica Sinica*, 33(11), 36–  
557 47, doi: 10.1007/s13131-014-0530-6, 2014.

558 Fang, G. and Zhao, B.: A note on the main forcing of the northeastward flowing current off the Southeast  
559 China Coast. *Prog. Oceanog.*, 21, 363–372, 1988.

560 Fang, Y., Fang, G. and Yu, K.: ADI barotropic ocean model for simulation of Kuroshio intrusion into  
561 China southeastern waters. *Chin. J. Oceanol. Limnol.*, 14(4), 357–366, 1996.

562 Farris, A. and Wimbush, M.: Wind-induced intrusion into the South China Sea. *J. Oceanogr.*, 52, 771–  
563 784, 1996.

564 Fichefet, T. and Maqueda, M. A.: Sensitivity of a global sea ice model to the treatment of ice  
565 thermodynamics and dynamics, *J. Geophys. Res.*, 102, 12609–12646, 1997.

566 Goosse, H., Campin, J. M., Deleersnijder, E., Fichefet, T., Mathieu, P. P., Maqueda, M. A. M., and  
567 Tartinville, B.: Description of the CLIO model version 3.0, Institut d’Astronomie et de Geophysique  
568 Georges Lemaitre, Catholic University of Louvain (Belgium), 2001.

569 Guan, B.: The warm current in the South China Sea—a current flowing against the wind in winter in  
570 the open sea off Guangdong province. *Oceanologia et Limnologia Sinica*, 9(2), 117–127, 1978 (in  
571 Chinese with English abstract).

572 Guan, B.: Winter counter—wind current off the south eastern China coast and a preliminary  
573 investigation of its source. *Proceedings of the Symposium on the Physical and Chemical Oceanography*  
574 *of the China Seas*. Beijing, China Ocean Press, 1–9, 1993.

575 Hellerman, S. and Rosenstein, M.: Normal monthly wind stress over the world ocean with error estimates.  
576 *J. Phys. Oceanogr.*, 13, 1 093–1 104, 1983.

577 Hu, J., Liang, H. and Zhang, X.: Sectional distribution of salinity and its indication of Kuroshio’s  
578 intrusion in southern Taiwan Strait and northern South China Sea late summer, 1994. *Acta Oceanologica*  
579 *Sinica*, 18(2), 225–236, 1999.

580 Hu, J., Kawamura, H., Hong, H. and Qi, Y.: A review on the currents in the South China Sea: seasonal  
581 circulation, South China Sea Current and Kuroshio intrusion. *J. Oceanogr.*, 56, 607–624, 2000.

582 Hu, J., Gan, J., Sun, Z., Zhu, J. and Dai, M.: Observed three dimensional structure of a cold eddy in the  
583 southwestern South China Sea, *J. Geophys. Res.*, 116, C05016, doi:10.1029/2010JC006810, 2011.

584 Huang, Q., Wang, W., Li, Y., Li, C. and Mao, M.: General situations of the current and eddy in the South  
585 China Sea. *Advance in Earth Sciences*, 7(5), 1–9, 1992 (in Chinese with English abstract)

586 Hunke, E. C. and Dukowicz J. K.: An elastic-viscous-plastic model for sea ice dynamics, *J. Phys.*  
587 *Oceanogr.*, 27, 1849–1867, 1997.

588 Ji, Q., Zhu, X., Wang, H., Liu, G., Gao, S., Ji, X. and Xu, Q.: Assimilating operational SST and sea ice  
589 analysis data into an operational circulation model for the coastal seas of China. *Acta oceanologica*  
590 *Sinica*, 34(7), 54–64, doi: 10.1007/s13131-015-0691-y, 2015.

591 Jiang, X., Zhong, Z. and Jiang, J.: Upper ocean response of the South China Sea to Typhoon Krovanh  
592 (2003). *Dynamics of Atmospheres and Oceans*, 47(1), 165–175, 2009.

593 Jing, Z. Y., Qi, Y. Q., Du, Y., Zhang, S. W. and Xie, L. L.: Summer upwelling and thermal fronts in the  
594 northwestern South China Sea: Observational analysis of two mesoscale mapping surveys. *J. Geophys.*  
595 *Res. Oceans*, 120, 1993–2006, doi:10.1002/2014JC010601, 2015.

596 Kanamitsu, M., Ebisuzaki, W., Woollen, J., Yang, S., Hnilo, J., Fiorino, M., and Potter, G.: NCEP-DOE  
597 AMIP-II Reanalysis (R-2). *Bulletin of the American Meteorological Society*, 1631–1643, Nov 2002.

598 Lellouche, J. M., Le Galloudec, O., Drévilion, M., Régnier, C., Greiner, E., Garric, G., Ferry, N.,  
599 Desportes, C., Testut, C. E., Bricaud, C., Bourdalle-Badie, R., Tranchant, B., Benkiran, M., Drillet, Y.,  
600 ~~Daudin, A. and De Nicola, C.: Evaluation of global monitoring and forecasting systems at Mercator~~  
601 ~~Ocean, *Ocean Sci.*, 9, 57–81, doi:10.5194/os-9-57-2013, 2013~~

602 Li, R., Zeng, Q., Gan, Z. and Wang, W.: Numerical simulation of South China Sea Warm Current and  
603 currents in Taiwan Strait in winter. *Progress in Natural Sciences*, 3(1), 21–25, 1993. (in Chinese with  
604 English abstract).

605 Li, L., Nowlin Jr., W. D. and Su, J.: Anticyclonic rings from the Kuroshio in the South China Sea.  
606 *Deep-Sea Res. I*, 45, 1469–1482, 1998a.

607 Li, W., Liu, Q. and Yang, H.: Principal features of ocean circulation in the Luzon Strait. *Journal of Ocean*  
608 *University of Qingdao*, 28(3), 345–352, 1998b (in Chinese with English abstract).

609 Liang, W., Yang, Y., Tang, T., and Chuang, W.: Kuroshio in the Luzon Strait. *J. Geophys. Res.*, 113,  
610 C08048, doi:10.1029/2007JC004609, 2008.

611 Liu, Q., Liu, C., Zheng, S., Xu, Q. and Li, W.: The deformation of Kuroshio in the Luzon Strait and its  
612 dynamics. *Journal of Ocean University of Qingdao*, 26(4), 413–420, 1996. (in Chinese with English  
613 abstract).

614 [Locarnini, R. A., Mishonov, A. V., Antonov, J. I., Boyer, T. P., and Garcia, H. E. World Ocean Atlas](#)  
615 [2005, Volume 1: Temperature. S. Levitus, Ed. NOAA Atlas NESDIS 61, U.S. Government Printing](#)  
616 [Office, Washington, D.C., 182 pp. 2006.](#)

617 Madec, G. and Imbard, M.: A global ocean mesh to overcome the North Pole singularity, *Clim. Dynam.*,  
618 12, 381–388, 1996.

619 Mao, Q., Shi, P. and Qi, Y.: Sea surface dynamic topography and geostrophic current over the South  
620 China Sea from Geosat altimeter observation. *Acta Oceanologica Sinica*, 21(1), 11–16, 1999. (in Chinese  
621 with English abstract).

622 Nan, F., Xue, H., Chai, F., Shi, L., Shi, M. and Guo, P.: Identification of different types of Kuroshio  
623 intrusion into the South China Sea. *Ocean Dynamics*, doi: 10.1007/s10236-011-0426-3, 2011a.

624 Nan, F., He, Z., Zhou, H. and Wang, D.: Three long-lived anticyclonic eddies in the northern South  
625 China Sea, *J. Geophys. Res.*, 116, C05002, doi:10.1029/2010JC006790, 2011b.

626 Nan, F., Xue, H., Chai, F., Wang, D., Yu, F., Shi, M., Guo, P. and Xiu, P.: Weakening of the Kuroshio  
627 intrusion into the South China Sea over the past two decades. *Journal of Climate*, 26, 8097–8110, doi:  
628 10.1175/JCLI-D-12-00315.1, 2013.

629 Nan, F., Xue, H. and Yu, F.: Kuroshio intrusion into the South China Sea: A review. *Progress in*  
630 *Oceanography*, 137(A), 314–333, doi: 10.1016/j.pocean.2014.05.012, 2015.

631 Okubo, A.: Horizontal dispersion of floatable particles in the vicinity of velocity singularity such as  
632 convergences. *Deep Sea Research*, 17, 445–454, 1970.

633 Pham, D. T., Verron, J., and Roubaud, M. C.: A singular evolutive extended Kalman filter for data  
634 assimilation in oceanography, *J. Mar. Syst.*, 16, 323–340, 1998.

635 Price, J., Sanford, T., Forristall, G.: Forced stage response to a moving hurricane. *J. Phys. Oceanogr.*,  
636 24(2), 233–260, 1994.

637 Qu, T.: Upper-layer circulation in the South China Sea. *J. Phys. Oceanogr.*, 90, 1450–1460, 2000.

638 Qu, T., Mitsudera, H. and Yamagata, T.: Intrusion of the North Pacific waters into the South China Sea.  
639 *J. Geophys. Res.*, 105(C3), 6415–6424, 2000.

640 Rio, M. H., Hernandez F.: A mean dynamic topography computed over the world ocean from altimetry,  
641 in situ measurements, and a geoid model, *J. Geophys. Res.*, 109, C12032, 2004

642 Roulet, G. and Madec, G.: Salt conservation, free surface, and varying levels: a new formulation for  
643 ocean general circulation models, *J. Geophys. Res.*, 105, 23927–23942, 2000.

644 Shapiro, R.: Linear Filtering. *Math. Comput.*, 29, 1094–1097, 1975.

645 Shchepetkin, A. and McWilliams, J.: The regional oceanic modeling system (ROMS): a split-explicit,  
646 free-surface, topography-following-coordinate oceanic model. *Ocean Modell.*, 9, 347–404,  
647 doi:10.1016/j.ocemod.2004.08.002, 2005.

648 Su, J.: Overview of the South China Sea circulation and its dynamics. *Acta Oceanologica Sinica*, 27(6),  
649 1–8, 2005.

650 Takano, K., Harashima, A. and Namba, T.: A numerical simulation of the circulation in the South China  
651 Sea—preliminary results. *Acta Oceanogr. Taiwanica*, 37, 165–186, 1998.

652 Wang, D., Liu, Y., Qi, Y., and Shi, P.: Seasonal variability of thermal fronts in the northern South China  
653 Sea from satellite data. *Geophys. Res. Lett.*, 28(20), 3963–3966, 2001.

654 Wang, D., Xu, H., Lin, J. and Hu, J.: Anticyclonic eddies in the northeastern South China Sea during  
655 winter 2003/2004. *J. of Oceanogr.*, 64(6), 925–935, 2008.

656 Wang, G., Su, J. and Chu P.: Mesoscale eddies in the South China Sea observed with altimeter data,  
657 *Geophys. Res. Lett.*, 30(21), 2121, doi:10.1029/2003GL018532, 2003.

658 Wang, G., Chen, D. and Su, J.: Winter eddy genesis in the Eastern South China Sea due to orographic  
659 wind jets. *J. of Phys. Oceanogr.*, 38(3), 726–732, 2008

660 Wang, H., Wang, Z., Zhu, X., Wang, D., Liu, G., 2012a. Numerical study and prediction of nuclear  
661 contaminant transport from Fukushima Daiichi nuclear power plant in the North Pacific Ocean. *Chin. Sci.*  
662 *Bull.* 57, 3518–3524. <http://dx.doi.org/10.1007/s11434-012-5171-6>.

663 Wang, J.: Global linear stability of the 2-D shallow-water equations: An application of the distributive  
664 theorem of roots for polynomials in the unit circle. *Mon. Wea. Rev.*, 124, 1301–1310, 1996.

665 Wang, J. and Chern, C.: The warm-core eddy in the northern South China Sea, I. Preliminary  
666 observations on the warm-core eddy, *Acta Oceanogr. Taiwan*, 18, 92–103, 1987. (in Chinese with  
667 English abstract)

668 Weiss, J.: The dynamics of enstrophy transfer in two dimensional hydrodynamics. *Physica D.*, 48, 273–  
669 294, 1991.

670 Williamson, G.: Hydrography and weather of the Hong Kong fishing ground. *Hong Kong Fisheries*  
671 *Bulletin*, 1, 43–49, 1970.

672 Wu, C. and Chiang, T.: Mesoscale eddies in the northern South China Sea. *Deep-Sea Res. II*, 54, 1575–  
673 1588, 2007.



674 Wu, C., Shaw, P. and Chao, S.: Assimilating altimetric data into a South China Sea model. *J. Geophys.*  
675 *Res.*, 104(C12), 29987–30005, 1999.

676 Wu, C., Chang, Y., Oey, L., et al.: Air-sea interaction between tropical cyclone Nari and Kuroshio.  
677 *Geophys. Res. Lett.*, 35(12), L12605, 2008.

678 Wyrтки, K.: Scientific results of marine investigation of the South China Sea and Gulf of Thailand. *Naga*  
679 *Rep.* 2, 195, 1961.

680 Xiu, P., Chai, F., Shi, L., Xue, H. and Chao, Y.: A census of eddy activities in the South China Sea during  
681 1993–2007. *J. Geophys. Res.*, 115, C03012, doi:10.1029/2009JC005657, 2010.

682 Zhang, F., Wang, W., Huang, Q., Li, Y. and Chau, K.: Summary current structure in Bashi Channel. In  
683 *Proceedings of Symposium of Marine Sciences in Taiwan Strait and Its Adjacent Waters*, 65–72, China  
684 Ocean Press, Beijing, 1995.

685 Zhang, Z., Zhao, W., Tian, J. and Liang, X.: A mesoscale eddy pair southwest of Taiwan and its influence  
686 on deep circulation, *J. Geophys. Res. Oceans*, 118, 6479–6494, doi:10.1002/2013JC008994, 2013.

687 Zhuang, W., Xie, S., Wang, D., Taguchi, B., Aiki, H. and Sasaki H.: Intraseasonal variability in sea  
688 surface height over the South China Sea, *J. Geophys. Res.*, 115, C04010, doi:10.1029/2009JC005647,  
689 2010.

690  
691  
692  
693  
694  
695  
696  
697  
698  
699  
700  
701  
702  
703  
704  
705  
706  
707  
708  
709

710  
 711  
 712  
 713  
 714  
 715  
 716  
 717  
 718  
 719  
 720  
 721  
 722  
 723  
 724  
 725  
 726  
 727

Table 1 Eddy Numbers of different datatype

|         | AVISO |       |       | MO   |       |       | SCSOFS |       |       |
|---------|-------|-------|-------|------|-------|-------|--------|-------|-------|
|         | CYCL  | ACYCL | TOTAL | CYCL | ACYCL | TOTAL | CYCL   | ACYCL | TOTAL |
| Spring  | 6     | 3     | 9     | 6    | 7     | 13    | 6      | 3     | 9     |
| Summer  | 2     | 3     | 5     | 4    | 7     | 11    | 3      | 5     | 8     |
| Fall    | 2     | 1     | 3     | 6    | 7     | 13    | 2      | 1     | 3     |
| Winter  | 5     | 2     | 7     | 5    | 5     | 10    | 1      | 3     | 4     |
| Overall | 15    | 9     | 24    | 21   | 26    | 47    | 12     | 12    | 24    |

728
