# Supplementary material for: Comparison and validation of global and regional ocean forecasting systems in the South China Sea
Source: Copernicus journal article supplement (doi:10.5194/nhess-2016-60), 2016-02-25
Supplement: Supplementary file [file nhess-2016-60-EC1-supplement.pdf]

1 **Comparison and validation of global and regional ocean**  
2 **forecasting systems ~~for~~ the South China Sea**

3 Xueming Zhu<sup>1</sup>, Hui Wang<sup>1</sup>, Guimei Liu<sup>1\*</sup>, Charly Régnier<sup>2</sup>, Xiaodi Kuang<sup>1</sup>, Dakui  
4 Wang<sup>1</sup>, Shihe Ren<sup>1</sup>, Zhiyou Jing<sup>3</sup>, Marie Drévillon<sup>2</sup>

5

6 <sup>1</sup>Key Laboratory of Research on Marine Hazards Forecasting, National Marine Environmental  
7 Forecasting Center, Beijing, 100081, China

8 <sup>2</sup>Mercator Océan, Ramonville Saint Agne, France

9 <sup>3</sup>State Key Laboratory of Tropical Oceanography, South China Sea Institute of Oceanology, Chinese  
10 Academy of Sciences, Guangzhou, 510301, China

11 *Correspondence to:* Guimei Liu (liugm@nmefc.gov.cn)

12 **Abstract.** In this paper, the performances of two operational ocean forecasting systems, [the global](#)  
13 Mercator Océan (MO) [Operational System, developed and maintained by Mercator Océan](#) in France and  
14 [the regional](#) South China Sea Operational Forecasting System (SCSOFS) [by the National Marine](#)  
15 [Environmental Forecasting Center \(NMEFC\)](#) in China, have been examined. Both systems can provide  
16 science-based nowcast/forecast products, ~~such as~~ [of](#) temperature, salinity, water level and ocean  
17 circulations. ~~Based on the observed satellite and in situ data have been obtained in 2012 in the South~~  
18 ~~China Sea, the C~~omparison and validation of the ocean circulations, the structures of the temperature  
19 and salinity, and some mesoscale activities, [such as ocean fronts, Typhoon, and mesoscale eddy,](#) are  
20 ~~conducted shown~~ based on the observed satellite and *in-situ* data obtained in 2012 in the South China  
21 ~~Sea. The results showed that~~Comparing with the observation, MO performs better in forecasting the  
22 ocean circulations and SST ~~of MO show better results than those of SCSOFS, and SCSOFS. However,~~  
23 ~~performs better in simulating~~ the structures of temperature and salinity ~~of SCSOFS are better than those~~  
24 ~~of MO.~~ For the mesoscale activities, [SCSOFS performance is better than MO in simulating](#) SST fronts  
25 and SST decreasing during the typhoon Tembin ~~of SCSOFS are better agreement~~ [compared](#) with the  
26 previous studies ~~and~~ [satellite data](#) ~~than those of MO;~~ but [model results from](#) both of [SCSOFS and](#)  
27 ~~MO~~ [them](#) show some differences from [satellite observations](#) ~~AVISO~~ [data.](#) Finally, ~~according to the~~  
28 ~~outcome of the results comparisoned in above.~~ [In conclusion,](#) some [recommendations](#) ~~suggestions~~ have  
29 been proposed for both [forecast](#) systems to improve their [forecasting](#) performances in the near further  
30 [based on our comparison and validation.](#)

31 **Keywords.** SCSOFS, Mercator Océan, South China Sea, Operational Forecasting System

## 32 1 Introduction

33 The South China Sea (SCS, Fig.1) is the largest and deepest semi-enclosed marginal sea of the  
34 Northwestern Pacific (NWP), with the area ~~is~~ about 3.5 million km<sup>2</sup>, the mean and maximum depth ~~is~~  
35 [ranging from](#) ~~about~~ 1200\_m and 5300\_m, respectively. [The northern SCS \(NSCS\) is a](#) wide continental  
36 shelf with depth less than 200\_m ~~located in the northern SCS (NSCS), and the southern SCS (SSCS)~~  
37 ~~comprises.~~ ~~There are~~ numerous islands, reefs, beaches, shoals in large basin ~~of the southern SCS (SSCS).~~  
38 ~~SCS~~ is connected with the adjacent seas through a number of channels, to the East China Sea in north,  
39 ~~to the~~ [Northwest Pacific Ocean](#) (NWP) in east, ~~to~~ the Sulu Sea in southeast, and ~~to~~ the Java Sea in south,

40 by the Taiwan Strait (TWS), the Luzon Strait (LUS), the Mindoro Strait and the Balabac Strait, the  
41 Karimata Strait, respectively. ~~SCS has its~~ unique geographical features, rich marine mineral and  
42 petroleum resources ~~so that it is very important for~~ ~~play a significant role to~~ many countries adjacent to it.  
43 The SCS is located in the East Asian Monsoon (EAM) winds regime, the northeasterly winds usually  
44 prevail with an average wind speed of 9 m/s over the whole domain in winter, while the southwesterly  
45 winds prevail with an average magnitude of 6 m/s dominating over the most parts of the SCS in summer  
46 (Hellerman and Rosenstein, 1983). The EAM is considered to be the major factors for driving the upper  
47 layer basin-scale circulation pattern in the entire SCS, showing an obvious seasonal variation with a  
48 cyclonic gyre in winter and an anti-cyclonic gyre in summer (Wyrski, 1961; Mao et al., 1999; Wu et al.,  
49 1999; Qu, 2000; Chu and Li, 2000). However, some other literatures insist that a persistent cyclonic gyre  
50 is present in the NSCS, while a semiannually changing from a cyclonic gyre in winter to an  
51 anti-cyclonic gyre regime in summer can be observed in the SSCS (Chao et al., 1996; Takano et al., 1998;  
52 Hu et al., 2000; Chern and Wang, 2003; Caruso et al., 2006; Chern et al., 2010). Chern et al. (2010)  
53 suggested that the three dynamical processes, the wind stress curl, the deep-water ventilation-induced  
54 vortex stretching in the central SCS, and a positive vorticity generated from the left flank of the Kuroshio  
55 in the LUS, play the equal importance to the formation of the persistent cyclonic gyre in the NSCS,  
56 according to the analysis of the results from several numerical experiments with different wind stress,  
57 topography and coastline.

58 In addition to the basin-scale circulations, there are still some sub-basin scale currents in the SCS, such as  
59 the Guangdong Coastal Current (Huang et al., 1992), the SCS Warm Current (SCSWC, Guan, 1978;  
60 Chao et al., 1995), Dongsha Coastal Current (DCC, Su, 2005), Luzon Coastal Current (LCC, Hu et al.,  
61 2000), and so on. However, there are still a lot of debates about the mechanisms of some of them among  
62 the studies reported by several authors, without reaching an agreement. For example, based on the results  
63 of the numerical simulations, the formation dynamical mechanism of the SCSWC may be related to the  
64 Kuroshio intrusion (Li et al., 1993; Cai and Wang, 1997), sea surface slope (Fang and Zhao, 1988; Guan,  
65 1993), or the wind relaxation (Chao et al., 1995).

66 The Kuroshio intrudes into the SCS through the LUS, carrying the warm and salty water from the NWP,  
67 significantly affecting the circulation pattern and the budgets of heat and salt in the NSCS (Farris and  
68 Wimbush, 1996; Wu and Chiang, 2007; Liang et al., 2008; Nan et al., 2013). However, it is still not in  
69 accordance with how the Kuroshio intrudes into the NSCS. As pointed out in Hu et al. (2000), there

70 existed four viewpoints on the Kuroshio intrusion as, a direct branch from the Kuroshio (Williamson,  
71 1970; Fang et al., 1996; Chern and Wang, 1998; Qu et al., 2000), a form of loop (Zhang et al., 1995; Liu  
72 et al., 1996; Farris and Wimbush, 1996), a form of extension (Hu et al., 1999), and a form of ring (Li et  
73 al., 1998a, b) at present. Nan et al. (2015) reviewed and summarized the Kuroshio intruding processes  
74 from observed data, numerical experiments and theoretical analyses, and concluded that there were three  
75 typical paths of the Kuroshio intruding the SCS, the looping path, the leaking path and the leaping path,  
76 which could be distinguished quantitatively by a Kuroshio SCS Index (KSI, Nan et al., 2011a) derived  
77 from the integral of geostrophic vorticity southwest of Taiwan. The three paths can change from one to  
78 another in several weeks.

79 In addition, many mesoscale eddy activities are another obvious physical characteristics of the NSCS,  
80 and ~~have~~ play a significant ~~great~~ influence ~~on~~ the dynamical environment of the NSCS. Eddies are  
81 generally more energetic than the surrounding currents and are an important component of dynamical  
82 oceanography at all scales. In particular they transport heat, mass, momentum and biogeochemical  
83 properties from their regions ~~where they are formed~~ of formation to remote areas where they can then  
84 impact budgets of ~~the tracers~~ heat, mass, momentum and biogeochemical properties. Eddies in the NSCS  
85 have attracted increasing attentions over recent ~~a few~~ decades. Much work has been done based on the  
86 combination of satellite observations and *in-situ* hydrographic data (Wang and Chern, 1987; Li et al.,  
87 1998; Chu et al., 1999; Wang et al., 2003; Hu et al., 2011; Nan et al., 2011b), or numerical models (Wu  
88 and Chiang, 2007; Xiu et al., 2010; Zhuang et al., 2010). Some of work has ~~been~~ focused on the statistical  
89 characteristics of eddies in the SCS, but they are greatly different from each other, owing to different  
90 criteria for eddy identification employed by different literatures (Wang et al., 2003; Xiu et al., 2010; Du  
91 et al., 2014). Some of work analyzed ~~s~~ eddies' seasonal variability (Wu and Chiang, 2007; Zhuang et al.,  
92 2010) and investigated ~~s~~ their genesis (Wang et al., 2008). Some of work mainly studied ~~s~~ specific eddies  
93 to better understand eddy's generation, development and disappearance mechanisms (Wang et al., 2008;  
94 Zhang et al., 2013).

95 As shown above, the dynamic processes and relative mechanisms are very complex, but still not clear ~~ed~~  
96 until now in the SCS. It will be much more difficult to predict the future status of the ~~future~~ ocean.  
97 National Marine Environmental Forecasting Center (NMEFC) is mainly responsible for the prediction of  
98 ~~the sea area of~~ the South China Sea, and has built a SCS Operational Forecasting System (SCSOFS). As  
99 is known to all, the open boundary forcing conditions plays an important role in the numerical prediction

100 of the regional ocean. Due to the various limitations, the current SCSOFS' open boundary conditions  
101 (OBC) are derived from the Simple Ocean Data Assimilation (SODA, [Carton and Giese, 2008](#))  
102 climatological monthly mean during the forecast run. It is extremely inappropriate for the real-time ocean  
103 prediction system, so we are planning to ~~generate~~transform the OBC from ~~SODA to~~ the real-time  
104 forecasting results derived from Mercator Océan (MO) to replace SODA on the next step, in order to  
105 further improve prediction accuracy of the SCSOFS. Before carrying out this work, it is necessary to  
106 compare and validate the performance of MO in the SCS.

107 ~~The focusing of T~~his paper ~~focuses will be the~~ comparison and validation of the performances of MO and  
108 SCSOFS in the SCS; based on the observation data we have got in 2012. The rest of this paper is  
109 organized as follows. Section 2 gives the introductions to the observed data which are employed to  
110 validate the systems, and the configurations of MO and SCSOFS. Section 3 shows the results of  
111 comparison and validation and discussions. Section 4 presents the summary and conclusions.

## 112 2 Observed data and numerical operational systems

### 113 2.1 Satellite data

114 The Map of Sea Level Anomaly (MSLA) and Map of Absolute Dynamic Topography (MADT) data, ~~also~~  
115 with the derived relative Geostrophic Velocity Anomaly (GVA) and Absolute Geostrophic Velocity  
116 (AGV) data ~~derived from them, respectively,~~ are used to analysis the mesoscale eddy in the SCS and  
117 compare with the numerical simulations. They are all-sat-merged and gridded delayed-time altimeter  
118 product produced by SSALTO/DUACS and distributed by Aviso in April 2014, with support from  
119 Centre National D'études Spatiales (Cnes, [www.aviso.altimetry.fr](http://www.aviso.altimetry.fr)). The products are directly  
120 computed~~sampled~~ on a  $0.25^{\circ} \times 0.25^{\circ}$  spatial resolution Cartesian grid in both longitude and latitude ~~from~~  
121 ~~the Mercator gridded product~~, with a daily temporal resolution. Its period covers from 1993 to present,  
122 and the period of reference has been changed from 7 years (1993-1999) to 20 years (1993-2012). It has  
123 been corrected for instrumental errors, environmental perturbations, the ocean sea state influence, the  
124 tide influence, atmospheric pressure and multi-mission cross-calibration (CLS, 2015).

125 Two kinds of Sea Surface Temperature (SST) data ~~are will be~~ used in this paper. One is derived from the  
126 merged satellite's infrared sensors (AVHRR/NOAA) and microwave/AVHRR, sensor  
127 (AMSR-E/AQUA MetOp/AVHRR, GCOMW1/AMSR2, Coriolis/WINDSAT), and *in-situ* SST (buoy

128 | ~~and ship~~ data Global Daily SST (MGDSST), with a  $0.25^{\circ} \times 0.25^{\circ}$  horizontal resolution, which ~~are~~  
129 | analyzed and published ~~at the Office of Marine Prediction of the~~ Japan Meteorological Agency  
130 | (JMA). The data can be obtained from <http://near-goos1.jodc.go.jp/>.

131 | The other one is derived from the NOAA ~~0.25°×0.25+4°~~ daily Optimum Interpolation Sea Surface  
132 | Temperature (OISST), which is an analysis constructed by combining observations from different  
133 | platforms, such as satellites, ships, buoys, on a regular grid via optimum interpolation. Right now,  
134 | National Centers for Environmental Information (NCEI) provides two kinds of OISST: one uses infrared  
135 | satellite data from the Advanced Very High Resolution Radiometer (AVHRR) named as AVHRR-only,  
136 | and the other one uses AVHRR data along with microwave data from the Advanced Microwave  
137 | Scanning Radiometer (AMSR) on the Earth Observing System Aqua or AMSR-E satellite named as  
138 | AVHRR+AMSR. ~~Since the production of the AVHRR+AMSR data ended in 2011, t~~The first one,  
139 | AVHRR-only, is used in this study, which spans 1981 to the present and can be downloaded from the  
140 | website <http://www.ncdc.noaa.gov/oisst/data-access>.

## 141 | 2.2 *In-situ* data

142 | The *in-situ* data employed in this paper for the comparison and validation of both systems are provided  
143 | by the South China Sea Institute of Oceanology, Chinese Academy of Sciences. There were one mooring  
144 | to measure the sea water velocity and 5 cruises ~~conducted~~implemented to measure the temperature and  
145 | salinity (TS) in the SCS during 2012.

146 | The mooring station is located at Maoming (Fig. 1), where bottom-mounted upward-looking 75 kHz  
147 | Acoustic Doppler Current Profilers (ADCPs) ~~were~~are deployed to monitor the current profile (U  
148 | component and V component) from the depth of 2\_m to 48\_m with a 2-m interval in vertical. The period of  
149 | the monitoring is from 11 July to 8 October, in 2012, with a temporal interval 10 min. Firstly, the  
150 | ~~outlier~~abnormal data are eliminated from the original measured data; ~~in the secondly~~, a low-pass filter  
151 | with 25-hour is applied to ~~remove~~filter out the tidal currents; and ~~daily mean currents are calculated using~~  
152 | ~~a 25-hour averaging~~ing is calculated to get the daily average data, ~~which were used in order~~ to compare and  
153 | validate with the simulated results of MO and SCFOFS.

154 | The TS data from ~~the five~~5 cruises ~~were~~are measured by SeaBird 19 plus  
155 | conductivity-temperature-depth (CTD) with 1-m resolution in vertical. Among the ~~five~~5 cruises, one is  
156 | the Qiongdong cruise in the NSCS, which was conducted ~~for~~9 days from 12 to 20 July at 90 stations

157 along 6 sections (See Fig.1); another one is the Nansha cruise around the Nansha Islands, which was  
158 conducted for 5 days from 24 to 28 August at 17 stations along 10°N section from 109.5°E to 117.5°E.  
159 The TS data from those two cruises will be used to compare and validate the TS distribution from MO  
160 and SCSOFS in vertical and horizontal. ~~All the measured~~The TS data collected from all the 5 cruises  
161 will be ~~used~~collected to perform a correlation analysis of each of the simulated predictions of compare  
162 with the simulated data from MO and SCSOFS models with the observations via correlation analysis.

### 163 2.3 The configurations of SCSOFS

164 The SCSOFS ~~uses~~is build up based on the Regional Oceanic Modelling System (ROMS), which is a  
165 three-dimensional, non-linear primitive equations, free surface, hydrostatic, split-explicit,  
166 topography-following-coordinate in vertical and orthogonal curvilinear in horizontal on a staggered  
167 Arakawa C-grid (Arakawa and Lamb, 1977) oceanic model (Shchepetkin and McWilliams, 2005).  
168 To avoid the influences of boundary to the circulations in the SCS, the model's boundaries was extended  
169 to southward and eastward, then the model covered a larger domain (4.5°S to 28.3°N, 99°E to 145°E, Fig.  
170 1) than the SCS. The horizontal resolution varies from 1/12° in the south and east boundary to 1/30° in  
171 the SCS. There were 36 s-coordinate levels in the vertical with the thinnest layer being 0.16 m on the  
172 surface. The bathymetry was extracted from the ETOPO1 data sets published by U.S. National  
173 Geophysical Data Center (NGDC), which is a global relief model of Earth's surface that integrates ocean  
174 bathymetry and land topography, with 1 arc-minute resolution (Amante and Eakins, 2009). The ETOPO1  
175 dataset has combined the satellite altimeter observations, shipping load sonar measurement, multi  
176 resolutions digital terrain database and the global digital terrain model and many other data sources, and  
177 it has been used in the global and regional oceanic models widely. And the original ETOPO1 bathymetry  
178 was revised in the area of ~~near~~next to the coast of China mainland according to the *in-situ* data collected  
179 in NMEFC measured by our group, then smoothed according to Shapiro (1975). The maximum depth was  
180 set to be 6000 m and the minimum depth to be 10 m in the model (Wang, 1996).

181 The initial temperature and salinity conditions were derived from the climatology monthly mean Simple  
182 Ocean Data Assimilation (SODA, ~~Carton and Giese, 2008~~) in January. However, the initial velocities  
183 and elevation were set to zero, which means to integrate the model from a static status. The model's  
184 western lateral boundary was treated as a wall. The other three (northern, southern, eastern) lateral  
185 boundaries were opened, whose temperature, salinity, velocity, and elevation were prescribed by spatial

186 interpolation of the monthly mean SODA dataset. The 2D and 3D velocities, through the open  
187 boundaries, are modulated to guarantee the conservation of volume flux in the whole model domain. In  
188 addition, the nudging technology was used for 3D velocity, temperature, and salinity to the three open  
189 lateral boundaries with a 30-day time scale for outflow and 3-day for inflow.

190 The model is forced using 6-hourly wind stress, net fresh water fluxes, net heat fluxes, surface solar  
191 shortwave radiation at surface from NCEP\_Reanalysis 2 data provided by the NOAA/OAR/ESRL PSD,  
192 Boulder, Colorado, USA, [accessible](http://www.esrl.noaa.gov/psd/) from their web site at <http://www.esrl.noaa.gov/psd/> (Kanamitsu et  
193 al., 2002). In order to get more reasonable simulated SST, the kinematic surface net heat flux sensitivity  
194 to SST ( $dQ/dSST$ ) is used to introduce thermal feedback to correct net surface heat flux (Barnier et al.,  
195 1995) with a constant number  $-30 \text{ W/m}^2$  over the whole domain. [The MGDSST data is used to correct net](#)  
196 [surface heat flux](#). In addition, the monthly mean climatology discharges of the Mekong River and the  
197 Pearl River are prescribed to the model.

198 The system was run with 6 seconds time step for the external mode, and 180 seconds for the internal  
199 mode under the initial conditions, boundary conditions and surface forcing mentioned in above. The  
200 system was conducted a hindcast run from 2000 to 2011 after a 15 years climatology run for spin-up  
201 (Wang et al., 2012). The model results ~~were~~ archived to the snapshot with a 5-day interval, which  
202 ~~were~~ used as the ensemble members for the EnOI (Ensemble Optimal Interpolation) method  
203 assimilation. After the hindcast run, the system was conducted an assimilation run in 2012 with EnOI  
204 method, the along track SLA data from AVISO had been assimilated as the observations with a 7-day  
205 time window. The details on the EnOI applied in the SCSOFS can be referred as Ji et al. (2015). The  
206 assimilated results ~~were~~ archived to daily mean with a 1-day interval in 2012, which ~~were~~ used  
207 to compare and validate in this paper. Then the system is [implemented into operations](#) in NMEFC  
208 since January 1st, 2013. It runs [on daily bases](#) for 6 days [simulations](#) (1-day nowcast and 5-day forecast)  
209 ~~to~~ and provides 120-hour forecasting products, ~~which including of the three dimensional 3D~~ ocean  
210 temperature, salinity and currents with 24 hours interval.

#### 211 **2.4 The configurations of MO**

212 The high resolution global analysis and forecasting system PSY4V1R3 was operational as the V2 of the  
213 MyOcean project from February 2011 up to April 2013, when it was replaced by the PSY4V2R2 system.



214 During this period, PSY4V1R3 has been producing weekly 14-day hindcasts and daily 7-day forecasts.  
215 [The PSY4V1R3 configuration described as followed is indicated for as MO model through this paper.](#)  
216 The model configuration of PSY4V1R3 is based on a tripolar ORCA grid type (Madec and Imbard,  
217 1996) in the NEMO 1.09 version with a  $1/12^\circ$  horizontal resolution which means 9 km at the Equator, 7  
218 km at mid latitudes and 2km toward the Ross and Weddel Sea. The grid cells follow an Arakawa C-grid  
219 type (~~Arakawa and Lamb, 1977~~). The 50-level vertical discretization retained in this system has 1m  
220 resolution at the surface, decreasing to 450\_m at the bottom and 22 levels within the upper 100\_m. “Partial  
221 cell” parametrization was chosen for a better representation of the topographic floor (Barnier et al.,  
222 2006). The high frequency gravity waves are filtered out by the free surface formulation of Roullet and  
223 Madec (2000).

224 For the diffusion, a horizontal bilaplacian was added along the equator ( $20_m^2s^{-1}$ ) and two laplacians in  
225 the Canadian straits (up to  $100_m^2s^{-1}$ ). Laplacian lateral isopycnal diffusion was added on tracers ( $125$   
226  $m^2s^{-1}$ ) and a horizontal biharmonic viscosity was added for the momentum ( $-1 \times 10^{10} m^4s^{-1}$  at the  
227 Equator and decreasing poleward as the cube of the grid size). In addition, the vertical mixing is  
228 parameterized according to a turbulent closure model (TKE order 1.5) adapted by Blanke and Delecluse  
229 (1993), the lateral friction condition is a partial-slip condition with a regionalization for the  
230 Mediterranean Sea, Indonesian region, Canadian straits and Cape Horn. The atmospheric fields are taken  
231 from the ECMWF (European Centre for Medium Range Weather Forecasts) Integrated Forecast System  
232 at a daily average frequency. Momentum and heat turbulent surface fluxes are computed from CLIO bulk  
233 formulae (Goosse et al., 2001). ~~We use a~~ viscous-plastic rheology formulation ~~is used~~ for the LIM2\_VP  
234 ice model (Fichefet and Maqueda, 1997, LIM2\_VP in Hunke and Dukowicz 1997). A multivariate data  
235 assimilation (Kalman Filter kernel with SEEK formulation , Pham et al., 1998) of *in-situ* T and S (from  
236 Coriolis/Ifremer), along-track MSLA (from AVISO, with MDT from Rio and Hernandez, 2004) and  
237 intermediate resolution SST (~~0.25°×0.25+4°~~ SST product RTG from NOAA) is performed with the  
238 SAM2 software (Lellouche et al., 2013). An Incremental Analysis Update (IAU) centered on the 4th day  
239 of the 7-day assimilation window ensures a smooth correction of T, S, U, V and SSH ([Sea Surface](#)  
240 [Height](#)). The assimilation cycle consists of a first 7-day simulation called guess or forecast, at the end of  
241 which the analysis takes place. The IAU correction is then computed and the model is re-run on the same  
242 week, progressively adding the correction. The increment is distributed in time with a Gaussian shape  
243 which is centered on the 4th day. More details on the SAM2 software (applied on other model

Formatted: Font: Not Bold

244 configurations) can be found in Lellouche et al. (2013) except that no large scale bias correction is  
245 applied in PSY4V1R3. Concerning the initial conditions, the PSY4V1R3 was started in April 2009 from  
246 a 3D climatology of temperature and salinity (WOA2005, Antonov et al., 2006; Locarnini et al., 2006).

### 247 3 Comparisons, validations and discussion

#### 248 3.1 Velocities

##### 249 3.1.1 Absolute Geostrophic Velocity

250 Figure 2 shows the distributions of the monthly AGV composited with Sea Surface Height (SSH) from  
251 AVISO, MO, and SCSOFS in January, April, July, and October of 2012, respectively. Here we use the  
252 January, April, July, and October represent winter, spring, summer, and autumn, respectively. It is  
253 valuable to note that the AGV of MO and SCSOFS are not the velocities output from the numerical  
254 model directive. However, in order to better comparison, they are recalculated according to SSH from the  
255 model output on every day and assuming geostrophic balance following Eq. (1):

$$256 \quad u = -\frac{g}{f} \frac{\partial SSH}{\partial y} \quad v = \frac{g}{f} \frac{\partial SSH}{\partial x} \quad (1)$$

257 where  $g$  is gravitation acceleration,  $f$  is the Coriolis parameter,  $x$ ,  $y$  are the east, north axis;  $u$ ,  $v$  are the  
258 eastward, northward velocity components in horizontal, respectively.

259 ~~Comparisons By comparing of the observations of AVISO with the results from MO and SCSOFS shows~~  
260 ~~that among the three results,~~ both MO and SCSOFS can catch the main basin-scale oceanic circulation  
261 pattern in the SCS, and show that a cyclonic gyre in winter and an anti-cyclonic gyre in summer, which  
262 being well accordance with the pattern of AVISO, ~~except that the current speeds are a little stronger than~~  
263 ~~AVISO~~. It is worth to mention that the result of MO is in good well agreement with the AVISO in  
264 January, such as the southward western boundary currents along the eastern coast of Vietnam, the LCC,  
265 the anti-cyclonic eddy in the western of the LUS around (118°E, 21°N), the cyclonic eddy in the eastern  
266 of the Vietnam around (113°E, 15°N). However, the result of SCSOFS is much smoother without  
267 obvious mesoscale or small scale circulations, or they are very weaker (0.2-0.4 m s<sup>-1</sup>) than those (0.6-0.8  
268 m s<sup>-1</sup>) of AVISO or MO. The circulation is chaos in spring in the SCS, though the circulation pattern of  
269 MO is in better agreement with the one of AVISO than the one from of SCSOFS. ~~All the three results~~  
270 ~~show T~~the anti-cyclonic eddy around (111°E, 10°N) and the western boundary jet in the southeast of the  
271 Vietnam in summer, with the maximum speed being about 1.0 m s<sup>-1</sup>, 0.9 m s<sup>-1</sup>, and 0.7 m s<sup>-1</sup> ~~are shown for~~

Comment [ZA1]: What are three results referring  
Results from MO and SCSOFS, what is the third?  
(geostrophic flow?)

Comment [ZA2]: See above comments

272 by AVISO, MO, SCSOFS, respectively. The westward intensification along the eastern coast of the  
273 Vietnam is ~~more~~ obvious in autumn than other three seasons, and the maximum speed is more than  
274  $1.0\text{ m s}^{-1}$  for MO and SCSOFS, but  $0.7\text{ m s}^{-1}$  for AVISO.

275 As mentioned in Sect. 1, the Kuroshio intruding the SCS through the LUS has been distinguished by  
276 three types as the looping path, the leaking path and the leaping path, according to Nan et al. (2011a). All  
277 three results show the looping path in winter, the leaping path in summer and leaking path in autumn,  
278 which is well ~~consistent~~ ~~accordance~~ with the model results showed by Wu and Chiang (2007). However,  
279 AVISO, MO, and SCSOFS show the leaking path, looping path, and leaping path in spring, respectively.

### 280 3.1.2 Time series from mooring station

281 Figure 3 shows the comparison of the daily mean time series of ~~the~~ u, v components from the mooring,  
282 MO, and SCSOFS ~~at~~ 40m-depth layer at the Maoming station (See Fig. 1) from July 11 to October 8,  
283 2012. Both MO and SCSOFS can ~~capture~~ ~~catch~~ the ~~similar~~ variation trends of the time series with the  
284 mooring observation. Especially, MO results ~~match~~ ~~have represented~~ the observed current variations  
285 well for both u- and v- component, during the period of the Typhoon Kai-tak on 17 August 2012.  
286 Although SCSOFS shows the larger velocity during the Typhoon Kai-tak, the maximum velocity range  
287 ~~of large~~ is less than the observation and ~~anticipating leading~~ the observation about 1 day. The root mean  
288 square errors (RMSE) between observations and models of MO and SCSOFS ~~and observation~~ are  $0.075$   
289  $\text{ m s}^{-1}$ ,  $0.094\text{ m s}^{-1}$  for u-component,  $0.062\text{ m s}^{-1}$ ,  $0.084\text{ m s}^{-1}$  for v-component, respectively. Overall, MO  
290 results are in better agreement with the observations than ~~those of~~ SCSOFS. ~~However,~~ SCSOFS results  
291 have a temporal ~~phase~~ bias (phase shift) comparing with the observation, which is leading the  
292 observations about 1 day.

## 293 3.2 Temperature and Salinity

### 294 3.2.1 SST

295 SST is a very important prognostic variable in a hydrostatic ocean general circulation numerical model,  
296 which plays a key role to the ocean circulations and the air-sea interaction. So SST error is a crucial  
297 criteria of the numerical model skill, especially for an operational ocean circulation model. In fact, the  
298 SST simulation error is affected by several factors, for example the limitation of physical model, the  
299 surface atmospheric ice forcing conditions, the bias of initial field and the uncertainty from the open

Formatted: Font: Not Bold

300 boundary, as pointed out by Ji et al. (2015). Although the SST data have been assimilated into both MO  
301 and SCSOFS, the assimilated SST still has some errors for both systems.  
302 Figure 4 shows the distributions of the monthly mean SST errors between two systems and MGDSST in  
303 the SCS in 2012. The errors show an obvious regional distribution, the ~~larger~~~~bigger~~ errors mainly  
304 ~~appear~~~~exist~~ in the coastal regions for the depth shallower than 200 m, such as in the TWS, the eastern of  
305 the Guangdong province in January, the gulf of Tonkin in July. ~~What's more,~~ ~~T~~the strong seasonal  
306 variations for ~~the basin-averaged~~ SST error ~~can~~ also ~~can~~ be found, which is larger in winter and smaller in  
307 summer; ~~from~~ both systems. Comparing with MGDSST, the maximum, minimum, and mean ~~for the~~  
308 ~~basin-averaged 12~~ monthly RMSEs are 0.78 °C, 0.37 °C, 0.51 °C for the MO, 1.15 °C, 0.56 °C, 0.86 °C for  
309 the SCSOFS, respectively, in the SCS. Based on the Fig. 4, ~~MO performed better than SCSOFS in~~  
310 ~~simulating the simulated SST performance of MO is better than those of SCSOFS~~ by comparing with  
311 MGDSST.

### 312 3.2.2 Horizontal and vertical distribution of TS

313 ~~Water temperature and salinity~~The horizontal distributions ~~at~~~~of~~ 10-m depth layer ~~TS~~ in the eastern of  
314 Hainan island from the *in-situ* ~~observations~~ of Qiongdong cruise, ~~model results from~~ MO, and SCSOFS;  
315 ~~respectively,~~ are shown in Fig. 5. Two clear cold and salty water cores located at the eastern of Hainan  
316 island, which ~~are located~~~~being at~~ about (110.75°E, 19.2°N) and (111.3°E, 19.7°N), are shown in both  
317 *in-situ* ~~observations~~ and SCSOFS (Fig. 5) ~~with,~~ ~~except that~~ the ~~cores from~~ SCSOFS being more saline  
318 than ~~the in-situ observations~~. It can be easily deduced that the two cores are produced by upwelling  
319 process from the TS vertical distributions of the section K, F, H, and G (Jing et al., 2015).

320 Figure 6 shows the vertical ~~temperature and salinity~~~~TS~~ distributions from the *in-situ* ~~observations~~ of  
321 Qiongdong cruise, ~~model results from~~ MO and SCSOFS, along section E. Both systems have ~~gotten~~ the  
322 ~~same~~~~similar~~ vertical structures of TS with the *in-situ* ~~observations~~. All of them ~~demonstrated~~~~show out~~ the  
323 obvious upwelling systems, with cold and salty waters flowing from offshore to nearshore along the  
324 bottom. All three results show the upper mixing layer depth is about 15 m, ~~with~~ ~~T~~the sea water ~~is~~ well  
325 mixed above 15 m depth and the isotherms and isohalines are almost vertical, ~~where,~~ ~~indicating~~ strong  
326 ~~vertical~~ stratification ~~is shown~~ in summer. The diluted water is flushing from the nearshore to offshore,  
327 with the 33-isohaline ~~cross with the sea surface~~ ~~located~~ at ~~the position of~~ about 50 km ~~from the coast~~ for

328 both *in-situ* observations and SCSOFS, but at the position of about 420\_km for MO. In above, it is  
329 indicated that the results of SCSOFS is better agreement with the *in-situ* observations than those of MO.  
330 The vertical distributions of TS from the *in-situ* observations of Nansha cruise, and model results from  
331 MO, and SCSOFS along the 10°N section are shown in Fig.7 for the layer above 300\_m and Fig.8 for the  
332 layer of 300-1200\_m. Both systems have got almost the same vertical structures with the *in-situ*,  
333 especially for the upper mixing layer depth about 70\_m ~~are~~ shown in the three results. Water~~The~~  
334 temperature almost linearly decreases from 28\_°C to 3\_°C with the depth going deep increasing from the  
335 bottom of the upper mixing layer to ~~the~~1200\_m depth. However, ~~the~~ salinity increases from 33.5 psu to  
336 34.5 psu with the depth going deep increasing from the bottom of the upper mixing layer to about 200m  
337 depth, and keeps almost constant at 34.5 psu from 200\_m to 300\_m~~depth~~. Then a fresher water layer  
338 exists in the middle layer from about 400\_m to 700\_m with the salinity about 34.4 psu. Below the middle  
339 layer, the salinity again increases from 34.4 to 34.58 with the depth increasing from 700\_m to 1200\_m. It  
340 indicates that the results of MO and SCSOFS are in goodwell agreement with *in-situ* observations,  
341 except that the salinity of the fresh water in the middle layer from MO is less than 34.4 whichand is  
342 fresher than those of *in-situ* and SCSOFS, but the thickness of the fresh layer is thicker than those of  
343 *in-situ* and SCSOFS.

Comment [ZA3]: It is not clear which layer

### 344 3.2.3 Correlation analysisship between model and *in-situ*

345 In order to better compare and validate the performances of the two systems, we collected all the  
346 measured TS data from five cruises in the SCS in 2012 to conduct a comprehensive correlation analysis.  
347 Figure 9 shows the comparison~~of relativity~~ of TS between MO, SCSOFS and *in-situ* by scatter points,  
348 respectively. Any point in the Fig.9 is corresponded with two values of temperature or salinity, one is  
349 from the *in-situ* along X axis, and the other one is from MO or SCSOFS along Y axis. The correlation  
350 coefficients of temperature are 0.987, 0.982, and of salinity are 0.717, 0.897, between MO, SCSOFS and  
351 *in-situ*, over the 95% significance level, respectively, which is showing the good relativity between MO,  
352 SCSOFS and *in-situ*. It also indicates that the relativity of temperature is in better agreement with *in-situ*  
353 than those of salinity for both MO and SCSOFS, and SCSOFS is in better agreement with *in-situ* than  
354 MO for salinity.

### 355 3.3 Mesoscale activities

#### 356 3.3.1 SST front

357 Oceanic front is a good indicator for connection between water masses with different hydrological  
358 features, which is an important marine mesoscale phenomenon. There are numerous SST fronts in the  
359 SCS, most of them located on the continental shelf with the depth below 200\_m or aligned with the shelf  
360 break, especially in the NSCS. A few ~~obviously evident~~ SST fronts have been identified from the long-term  
361 NOAA/NASA Pathfinder SST data, namely: Fujian-Guangdong Coastal Front, Pear River Estuary  
362 Coastal Front, Taiwan Bank Front, Kuroshio Intrusion Front, Hainan Island East Coastal Front, Tonkin  
363 Gulf Coastal Front (Wang et al., 2001). All of them exhibit very strong seasonal variability, which is  
364 mainly due to the EAM (Belkin and Cornillon, 2003).

365 Figure 10 shows the distributions of SST fronts from MO and SCSOFS for four seasons. The similar  
366 frontal patterns with their evident seasonal variations are shown in both systems, except for some small  
367 differences. In winter, most fronts reach maximum strength ( $>0.2\text{ }^{\circ}\text{C}/\text{km}$ ). The Fujian-Guangdong  
368 Coastal Front and Taiwan Bank Front are major fronts in the SCS which agree with previous satellite  
369 results from Wang et al. (2001). These two fronts merge and extend to Pearl River Estuary and the  
370 Hainan Island. The Hainan Island East Coastal Front is stronger in MO than in SCSOFS, whereas the  
371 Tonkin Gulf Coastal Front is stronger in SCSOFS than in MO. ~~In SCSOFS, the~~ Kuroshio Intrusion  
372 front is obvious ~~in SCSOFS~~, however, ~~it which~~ is hardly seen in MO. In spring, most fronts become weak  
373 obviously due to the weakening of northeaster monsoon ~~from~~ both systems, except that the Hainan  
374 West Coastal Front emerges in SCSOFS. In summer, weakening almost occurs in all the fronts  
375 mentioned above for SCSOFS, which is in agreement with the results of Wang et al. (2001). However,  
376 disappearing occurs in all the fronts for MO. In fall, most fronts fade and disappear, except that the  
377 Taiwan Bank front has very weak strength compared to other seasons for both systems. Both systems  
378 have not shown the Kuroshio Intrusion Front identified by Wang et al. (2001) in summer and fall.

#### 379 3.3.2 The Typhoon Tembin

380 There are a lot of typhoons in the SCS during the typhoon season in every year, so that the typhoon  
381 activities are very frequent in the SCS, especially in 2012. One ~~important~~ study on the air-sea  
382 interaction is the responding of the physical ocean dynamics to typhoon in the oceanic upper layer. One  
383 important responding is the decreasing of SST due to the strong vertical mixing caused by typhoon (Price

384 | et al., 1994). According to the SST observations from the satellite, SST usually decreases 2-5 °C due to  
385 | typhoon passing (Cione and Uhlhorn, 2003; D'Asaro et al., 2007; Wu et al., 2008; Jiang et al., 2009).  
386 | Dare and McBride (2011) ~~studied~~~~researched~~ the response of SST to the global typhoons during  
387 | 1981-2008 and indicated that the maximum decreasing of SST usually occurred in 1-day after typhoon  
388 | passing.

389 | In this section, we selected the typhoon Tembin as an example to validate the MO and SCSOFS model  
390 | skills for the SST simulations. As shown in Fig. 11, the typhoon Tembin ~~passed~~~~went~~ through and made a  
391 | perfect turn ~~around~~ in the NSCS from 25 to 28 August 2012. From the three results, we can find the  
392 | obvious decreasing of SST 1-day after typhoon passing, which is about 2-4 °C and ~~in good~~~~well~~  
393 | correspondence with previous studies mentioned in above. SCSOFS is ~~in~~ much better agreement with  
394 | OISST than MO, especially on 26 and 27 August 2012, not only for the range of SST decreasing, but also  
395 | for the domain of SST decrease~~ing~~.

### 396 | 3.3.3 Mesoscale eddy

397 | Mesoscale eddies cannot be identified and extracted from geophysical turbulent flow as observed by  
398 | satellite altimetry without suitable definition and a competitive identification algorithm. A number  
399 | ~~multitude~~ of different techniques for automatic identification of eddies have been proposed based either  
400 | on physical or geometric criteria of the flow field. In this study, a free-threshold eddy identification  
401 | algorithm with the SLA data is employed. This algorithm is based on the vector geometry method and  
402 | Okubo-Weiss method (Okubo, 1970; [Weiss, 1991](#)) with six constraints applied to the SLA to detect an  
403 | eddy: (1) a vorticity-dominated region at the eddy center ( $W < 0$ , here  $W$  is the Okubo-Weiss parameter,  
404 | for its definition referred as [Xiu et al.\(2010\)](#)) must exist; (2) the SLA magnitude has a local extreme  
405 | value (minimum or maximum); (3) closed contours of SLA around the eddy center must exist; (4) the  
406 | eddy radius must be larger than 45km.(5)the eddy amplitude must be larger than 4cm. In this study, the  
407 | amplitude is defined as the absolute value of the SLA difference between the eddy center and the SLA  
408 | along the eddy edge. The Eddy-tracking method used is the one developed by Chaigneau et al. (2008),  
409 | and we only keep eddies with life span not less than 28 days. Eddies were analyzed and compared based  
410 | on MO, AVISO and SCSOFS in 2012. The numbers of eddies for three types of data were in Table 1,  
411 | cyclones and anti-cyclones were counted separately and seasonally.

Comment [ZA4]: What is this?

412 The spatial distribution of eddy ~~origin birthplace~~ is shown in Fig 12. MO has more eddies formed,  
413 especially ~~more~~ anti-cyclones formed than those ~~in of~~ AVISO, most of the excessive eddy cores were  
414 found near the middle of SCS. SCSOFS has more anti-cyclones as well and less cyclones than AVISO.  
415 Both MO and SCSOFS show excessive eddies formed in the middle of the basin and less eddies in the  
416 western of the east of Vietnam. The SLA of SCSOFS and MO is calculated simply by subtracting mean  
417 SSH (~~2~~14 years mean for SCSOFS and only one-year mean for MO) instead of an uniformed Mean Sea  
418 Surface, which might cause the excessive anti-cyclones in both models. ~~Observations of AVISO, and~~  
419 ~~model results from MO and SCSOFS. All three types of data show agree~~ that less eddies formed in the  
420 middle part of NSCS.

421 As for the seasonal distributions (figures not shown), all three data have most eddies in spring ~~and less in~~  
422 ~~fall~~. Both AVISO and SCSOFS have ~~less eddies in fall, and~~ more cyclones than anti-cyclones in spring  
423 and fall, and all three have less cyclones ~~than anti-cyclones~~ in summer. SCSOFS differs with AVISO  
424 mainly in winter while they agree reasonably in the other three seasons. MO has surplus eddies counted  
425 in every season especially for anti-cyclones, which might be ~~causes~~ of the ~~errors~~ introduced by the  
426 simplified calculation of SLA.

#### 427 4 Conclusions

428 Two operational ocean analysis and forecasting systems, MO and SCSOFS, have been built based on the  
429 state-of-the-art hydrodynamic ocean model in France and China, respectively. ~~This paper demonstrated~~  
430 ~~the results of~~ comparison and validation for the performance of both systems on the ocean circulation, the  
431 structures of the TS, and mesoscale activities in the SCS, based on the observed satellite and *in-situ* data  
432 in 2012, ~~are shown in this paper~~. The comprehensive performances for the both systems are summarized  
433 as follow.

434 Both systems have ~~capabilities to simulate caught~~ the main basin-scale circulations in the SCS and ~~model~~  
435 ~~results are in good been well~~ agreement with the ~~result of~~ AVISO data. And ~~MO has better performance~~  
436 ~~than SCSOFS in simulating the results of MO are better agreement with those of AVISO than those of~~  
437 ~~SCSOFS for~~ several branches and eddies in January. ~~SCSOFS did not generate~~ There are no many  
438 mesoscale or small scale circulations ~~shown in SCSOFS~~, which may be ~~caused by of~~ a little strong  
439 horizontal mixing set in the model. The westward intensification in the eastern coast of the Vietnam is

Comment [ZAS]: What does this refer?



440 ~~the most~~ strongest in autumn among the four seasons. For the type of the Kuroshio intruding the SCS, the  
441 ~~AVISO observations, and model~~ ~~three~~ results from both MO and SCFOFS show the looping path in  
442 winter, the leaping path in summer and leaping path in autumn. However, the leaping path, looping path  
443 and leaping path are shown for AVISO, MO and SCFOFS in spring, ~~respectively~~.

444 Both systems ~~demonstrated get~~ the ~~similar~~ variation ~~trends in of the~~ u and v components time series  
445 with the mooring observation. The RMSE between MO, SCFOFS and mooring observation are 0.075  
446 m/s, 0.094 m/s for u-component, 0.062 m/s, 0.084 m/s for v-component, respectively. The results of MO  
447 are in better agreement with the observation than those of SCFOFS, especially during the period of the  
448 Typhoon Kai-tak.

449 The maximum, minimum, and mean for the basin-averaged 12 monthly RMSEs between MO and  
450 MGSST are 0.78°C, 0.37°C, 0.51°C, between SCFOFS and MGSST are 1.15°C, 0.56°C, 0.86°C ~~for~~  
451 ~~the SCFOFS~~ in the SCS, respectively. For the horizontal and vertical distributions of TS, both systems  
452 have ~~achieved get~~ the same structures with the *in-situ* data, but the results of SCFOFS are in better  
453 agreement with the *in-situ* observations than those of MO. The correlation coefficients ~~of temperature~~  
454 are 0.987 ~~and~~, 0.982 for temperature, ~~and of salinity are~~ 0.717 ~~and~~, 0.897 for salinity, between model  
455 results from MO and SCFOFS and *in-situ* data, over the 95% significance level, respectively. It  
456 indicates that the good relativity between MO, SCFOFS and *in-situ*, the relativity of temperature is better  
457 agreement with *in-situ* than those of salinity for both MO and SCFOFS, and SCFOFS is better agreement  
458 with *in-situ* than MO for salinity.

Comment [ZA6]: It is not clear

459 The similar SST frontal patterns with their evident seasonal variations are shown in both systems. Most  
460 fronts achieve maximum strength in winter, become weak obviously due to the weakening of northeast  
461 monsoon EAM in spring and summer, fade and disappear in autumn, ~~which~~ ~~it~~ is consistent  
462 ~~agreement~~ with the result of Wang et al. (2001).

463 During the typhoon Tembin in the NSCS, the obviously decreasing of SST about 2-4°C occurs 1-day  
464 after typhoon passing shown in the results of MO, SCFOFS and OISST, which is consistent  
465 ~~agreement~~ with previous studies. SCFOFS is in much better agreement with OISST than MO ~~both~~ ~~for~~  
466 ~~both the~~ range and domain of SST decreasing.

467 MO has more eddies formed near the middle of SCS than AVISO, especially for anti-cyclones. SCFOFS  
468 has more anti-cyclones ~~as well~~, but less cyclones than AVISO. AVISO data and model results from NO  
469 and SCFOFS ~~All three data show~~ have most eddies in spring and least in fall, and less cyclones than

470 anti-cyclones in summer. Both AVISO and SCSOFS have more cyclones than anti-cyclones in spring  
471 and fall.

472 In order to improve ~~their~~ performances ~~of MO and SCSOFS~~ ~~further~~ in the SCS in future based on the  
473 results of ~~according to~~ the comparison and validation for the two systems, ~~MO and SCSOFS, we would~~  
474 ~~like to propose some suggestions to modify the systems.~~ Some recommendations are proposed as below:

475 For MO, we would like to suggest (1) to modify the model bathymetry in the coast area for the depth less  
476 than 200m to improve the model performance in shallow water area, such as SST front; (2) to change the  
477 initial conditions of TS to improve the TS vertical structures, especially for the salinity in deep water  
478 area; For SCSOFS, we would like to suggest (1) to weaken horizontal mixing to get more reasonable  
479 mesoscale or small scale circulations; (2) to optimize the data assimilation scheme further to better  
480 assimilate the *in-situ* and satellite data; (3) to replace the surface forcing data with the higher horizontal  
481 or temporal resolution; (4) to replace the boundary conditions from monthly to weekly or daily like ~~such~~  
482 ~~as~~ MO. For both systems, we also would like to suggest to try to get and assimilate more observed data  
483 during the typhoon period to catch the typhoon process more exactly.

#### 484 **Author contribution**

485 X. Zhu, H. Wang and G. Liu compared and validated the model results on velocities and TS. C.  
486 Régnier and M. Drévillon build the MO, D. Wang build the SCSOFS. X. Kuang analyzed the model  
487 results on mesoscale eddy. S. Ren analyzed the model results on SST front. Z. Jing provided the *in-situ*  
488 data. X. Zhu prepared the manuscript with contributions from all co-authors.

#### 489 **Acknowledgements**

490 We would like to thank the anonymous reviewers and the Editor, , for their valuable contributions  
491 that allow us to improve the manuscript substantially. This study is supported by the National Natural  
492 Science Foundation of China under contract No. 41222038, 41376016, 41206023 and the  
493 Strategic Priority Research Program of the Chinese Academy of Sciences Grant No. XDA1102010403.

494 **References**

- 495 Arakawa, A. and Lamb, V. R.: Computational design of the basic dynamical processes of the UCLA  
496 general circulation model. *Methods of Computational Physics*, 17. New York: Academic Press, 173–  
497 265, 1977.
- 498 Amante, C. and Eakins, B.: ETOPO1 1 Arc-Minute Global Relief Model: Procedures, Data Sources and  
499 Analysis. NOAA Technical Memorandum NESDIS NGDC-24. National Geophysical Data Center,  
500 NOAA, doi:10.7289/V5C8276M, 2009.
- 501 [Antonov, J. I., Locarnini, R. A., Boyer, T. P., Mishonov, A. V., and Garcia, H. E.. World Ocean Atlas](#)  
502 [2005, Volume 2: Salinity. S. Levitus, Ed. NOAA Atlas NESDIS 62, U.S. Government Printing Office,](#)  
503 [Washington, D.C., 182 pp. 2006.](#)
- 504 [Barnier, B., Siefridt, L., Marchesiello, P.. Thermal forcing for a global ocean circulation model using a](#)  
505 [three-year climatology of ECMWF analyses. \*J. Mar. Syst.\* 6 \(4\), 363–380,](#)  
506 [http://dx.doi.org/10.1016/0924-7963\(94\)00034-9](http://dx.doi.org/10.1016/0924-7963(94)00034-9), 1995.
- 507 Barnier, B., Madec, G., Penduff, T., Molines, J. M., Treguier, A. M., Le Sommer, J., Beckmann, A.,  
508 Biastoch, A., Boning, C., Deng, J., Derval, C., Durand, E., Gulev, S., Remy, E., Talandier, C., Theetten,  
509 S., Maltrud, M., McClean, J., and De Cuevas, B.: Impact of partial steps and momentum advection  
510 schemes in a global circulation model at eddy permitting resolution, *Ocean Dynam.*, 56, 543–567, 2006.
- 511 Belkin, I. and Cornillon, P.: SST fronts of the pacific coastal and marginal seas. *Pacific Oceanogr.*,  
512 1(2):90–113, 2003.
- 513 ~~[Bell, M. J., Schiller, A., Traon, P. Y. Le, Smith, N. R., Dombrowsky, E. and WilmerBecker, K.: An](#)~~  
514 ~~[introduction to GODAE OceanView. \*Journal of Operational Oceanography\*, 8, sup1, s2–s11, doi:](#)~~  
515 ~~[10.1080/1755876X.2015.1022041](http://dx.doi.org/10.1080/1755876X.2015.1022041), 2015.~~
- 516 Blanke, B. and Delecluse, P.: Variability of the tropical Atlantic-Ocean simulated by a general-  
517 circulation model with 2 different mixed-layer physics, *J. Phys. Oceanogr.*, 23, 1363–1388, 1993.
- 518 Cai, S. and Wang, W.: A numerical study on the circulation mechanism in the northeastern South China  
519 Sea and Taiwan Strait. *Tropic Oceanology*, 16(1), 7–15, 1997. (in Chinese with English abstract).
- 520 Carton, J. and Giese, B.: A Reanalysis of Ocean Climate Using Simple Ocean Data Assimilation  
521 (SODA). *Mon. Weath. Rev.*, 136, 2999–3017, doi: 10.1175/2007MWR1978.1, 2008.

522 Caruso, M., Gawarkiewicz, G. and Beardsley, R.: Interannual variability of the Kuroshio intrusion in the  
523 South China Sea. *J. Oceanogr.*, 62(4), 559–575, 2006.

524 Chaigneau, A., Gizolme, A. and Grados, C.: Mesoscale eddies off Peru in altimeter records:  
525 Identification algorithms and eddy spatiotemporal patterns, *Prog. Oceanogr.*, 79, 106–119, 2008.

526 Chao, S., Shaw, P. and Wang, J.: Wind relaxation as a possible cause of the South China Sea Warm  
527 Current. *J. Oceanogr.*, 51(1), 111–132, 1995.

528 Chao, S., Shaw, P. and Wu, S.: Deep water ventilation in the South China Sea. *Deep Sea Res. I*, 43, 445–  
529 466, 1996.

530 Chern, C. and Wang, J.: A numerical study of the summertime flow around the Luzon Strait. *J.*  
531 *Oceanogr.*, 54(1), 53–64, 1998.

532 Chern, C. and Wang, J.: Numerical study of the upper-layer circulation in the South China Sea. *J.*  
533 *Oceanogr.*, 59, 11–24, 2003.

534 Chern, C., Jan, S. and Wang, J.: Numerical study of mean flow patterns in the South China Sea and the  
535 Luzon Strait, *Ocean Dynamics*, 60, 1 047–1 059, doi:10.1007/s10236-010-0305-3, 2010.

536 ~~Chu, P. and Fan, C.: A low salinity cool core cyclonic eddy detected northwest of Luzon during the~~  
537 ~~South China Sea Monsoon Experiment (SCSMEX) in July 1998, *J. Oceanogr.*, 57, 549–563,~~  
538 ~~doi:10.1023/A:1021251519067, 2001.~~

539 Chu, P. and Li, R.: South China Sea Isopycnal-Surface Circulation. *J. Phys. Oceanogr.*, 30, 2420–2438,  
540 2000.

541 Chu, P., Lu, S. and Chen, Y.: A Coastal Air-Ocean Coupled System (CAOCS) evaluated using an  
542 Airborne Expendable Bathythermograph (AXBT) data set, *J. Oceanogr.*, 55, 543–558,  
543 doi:10.1023/A:1007847609139, 1999.

544 Cione, J. and Uhlhorn, E.: Sea surface temperature variability in hurricanes: Implications with respect to  
545 intensity change. *Monthly Weather Review*, 131(8), 1783–1796, 2003.

546 CLS, SSALTO/DUACS User handbook: (M)SLA and (M)ADT Near-Real Time and Delayed Time  
547 Products. CLS-DOS-NT-06-034, Issue 4.4, Nomenclature: SALP-MU-P-EA-21065-CLS, 2015.

548 Dare, R. and McBride, J.: Sea surface temperature response to tropical cyclones. *Monthly Weather*  
549 *Review*, 139(12), 3798–3808, 2011.

550 D’Asaro, E., Sanford, T., Niiler, P., Terrill, E.: Cold wake of hurricane Frances. *Geophys. Res. Lett.*,  
551 34(15), L15609, 2007.

552 Du, Y., Yi, J., Wu, D., He, Z., Wang, D., Liang, F.: Mesoscale oceanic eddies in the South China Sea  
553 from 1992 to 2012: evolution processes and statistical analysis. *Acta Oceanologica Sinica*, 33(11), 36–  
554 47, doi: 10.1007/s13131-014-0530-6, 2014.

555 Fang, G. and Zhao, B.: A note on the main forcing of the northeastward flowing current off the Southeast  
556 China Coast. *Prog. Oceanog.*, 21, 363–372, 1988.

557 Fang, Y., Fang, G. and Yu, K.: ADI barotropic ocean model for simulation of Kuroshio intrusion into  
558 China southeastern waters. *Chin. J. Oceanol. Limnol.*, 14(4), 357–366, 1996.

559 Farris, A. and Wimbush, M.: Wind-induced intrusion into the South China Sea. *J. Oceanogr.*, 52, 771–  
560 784, 1996.

561 Fichet, T. and Maqueda, M. A.: Sensitivity of a global sea ice model to the treatment of ice  
562 thermodynamics and dynamics, *J. Geophys. Res.*, 102, 12609–12646, 1997.

563 Goosse, H., Campin, J. M., Deleersnijder, E., Fichet, T., Mathieu, P. P., Maqueda, M. A. M., and  
564 Tartinville, B.: Description of the CLIO model version 3.0, Institut d’Astronomie et de Geophysique  
565 Georges Lemaitre, Catholic University of Louvain (Belgium), 2001.

566 Guan, B.: The warm current in the South China Sea—a current flowing against the wind in winter in  
567 the open sea off Guangdong province. *Oceanologia et Limnologia Sinica*, 9(2), 117–127, 1978 (in  
568 Chinese with English abstract).

569 Guan, B.: Winter counter—wind current off the south eastern China coast and a preliminary  
570 investigation of its source. *Proceedings of the Symposium on the Physical and Chemical Oceanography*  
571 *of the China Seas*. Beijing, China Ocean Press, 1–9, 1993.

572 Hellerman, S. and Rosenstein, M.: Normal monthly wind stress over the world ocean with error  
573 estimates. *J. Phys. Oceanogr.*, 13, 1 093–1 104, 1983.

574 Hu, J., Liang, H. and Zhang, X.: Sectional distribution of salinity and its indication of Kuroshio’s  
575 intrusion in southern Taiwan Strait and northern South China Sea late summer, 1994. *Acta Oceanologica*  
576 *Sinica*, 18(2), 225–236, 1999.

577 Hu, J., Kawamura, H., Hong, H. and Qi, Y.: A review on the currents in the South China Sea: seasonal  
578 circulation, South China Sea Current and Kuroshio intrusion. *J. Oceanogr.*, 56, 607–624, 2000.

579 Hu, J., Gan, J., Sun, Z., Zhu, J. and Dai, M.: Observed three dimensional structure of a cold eddy in the  
580 southwestern South China Sea, *J. Geophys. Res.*, 116, C05016, doi:10.1029/2010JC006810, 2011.

581 Huang, Q., Wang, W., Li, Y., Li, C. and Mao, M.: General situations of the current and eddy in the South  
582 China Sea. *Advance in Earth Sciences*, 7(5), 1–9, 1992 (in Chinese with English abstract)

583 Hunke, E. C. and Dukowicz J. K.: An elastic-viscous-plastic model for sea ice dynamics, *J. Phys.*  
584 *Oceanogr.*, 27, 1849–1867, 1997.

585 Ji, Q., Zhu, X., Wang, H., Liu, G., Gao, S., Ji, X. and Xu, Q.: Assimilating operational SST and sea ice  
586 analysis data into an operational circulation model for the coastal seas of China. *Acta oceanologica*  
587 *Sinica*, 34(7), 54–64, doi: 10.1007/s13131-015-0691-y, 2015.

588 Jiang, X., Zhong, Z. and Jiang, J.: Upper ocean response of the South China Sea to Typhoon Krovanh  
589 (2003). *Dynamics of Atmospheres and Oceans*, 47(1), 165–175, 2009.

590 Jing, Z. Y., Qi, Y. Q., Du, Y., Zhang, S. W. and Xie, L. L.: Summer upwelling and thermal fronts in the  
591 northwestern South China Sea: Observational analysis of two mesoscale mapping surveys. *J. Geophys.*  
592 *Res. Oceans*, 120, 1993–2006, doi:10.1002/2014JC010601, 2015.

593 Kanamitsu, M., Ebisuzaki, W., Woollen, J., Yang, S., Hnilo, J., Fiorino, M., and Potter, G.: NCEP-DOE  
594 AMIP-II Reanalysis (R-2). *Bulletin of the American Meteorological Society*, 1631–1643, Nov 2002.

595 Lellouche, J. M., Le Galloudec, O., Drévilion, M., Régnier, C., Greiner, E., Garric, G., Ferry, N.,  
596 Desportes, C., Testut, C. E., Bricaud, C., Bourdalle-Badie, R., Tranchant, B., Benkiran, M., Drillet, Y.,  
597 ~~Daudin, A. and De Nicola, C.: Evaluation of global monitoring and forecasting systems at Mercator~~  
598 ~~*Ocean, Ocean Sci.*, 9, 57–81, doi:10.5194/os-9-57-2013, 2013~~

599 Li, R., Zeng, Q., Gan, Z. and Wang, W.: Numerical simulation of South China Sea Warm Current and  
600 currents in Taiwan Strait in winter. *Progress in Natural Sciences*, 3(1), 21–25, 1993. (in Chinese with  
601 English abstract).

602 Li, L., Nowlin Jr., W. D. and Su, J.: Anticyclonic rings from the Kuroshio in the South China Sea.  
603 *Deep-Sea Res. I*, 45, 1469–1482, 1998a.

604 Li, W., Liu, Q. and Yang, H.: Principal features of ocean circulation in the Luzon Strait. *Journal of Ocean*  
605 *University of Qingdao*, 28(3), 345–352, 1998b (in Chinese with English abstract).

606 Liang, W., Yang, Y., Tang, T., and Chuang, W.: Kuroshio in the Luzon Strait. *J. Geophys. Res.*, 113,  
607 C08048, doi:10.1029/2007JC004609, 2008.

608 Liu, Q., Liu, C., Zheng, S., Xu, Q. and Li, W.: The deformation of Kuroshio in the Luzon Strait and its  
609 dynamics. *Journal of Ocean University of Qingdao*, 26(4), 413–420, 1996. (in Chinese with English  
610 abstract).

611 [Locarnini, R. A., Mishonov, A. V., Antonov, J. L., Boyer, T. P., and Garcia, H. E. World Ocean Atlas](#)  
612 [2005, Volume 1: Temperature. S. Levitus, Ed. NOAA Atlas NESDIS 61, U.S. Government Printing](#)  
613 [Office, Washington, D.C., 182 pp. 2006.](#)

614 Madec, G. and Imbard, M.: A global ocean mesh to overcome the North Pole singularity, *Clim. Dynam.*,  
615 12, 381–388, 1996.

616 Mao, Q., Shi, P. and Qi, Y.: Sea surface dynamic topography and geostrophic current over the South  
617 China Sea from Geosat altimeter observation. *Acta Oceanologica Sinica*, 21(1), 11–16, 1999. (in Chinese  
618 with English abstract).

619 Nan, F., Xue, H., Chai, F., Shi, L., Shi, M. and Guo, P.: Identification of different types of Kuroshio  
620 intrusion into the South China Sea. *Ocean Dynamics*, doi: 10.1007/s10236-011-0426-3, 2011a.

621 Nan, F., He, Z., Zhou, H. and Wang, D.: Three long-lived anticyclonic eddies in the northern South  
622 China Sea, *J. Geophys. Res.*, 116, C05002, doi:10.1029/2010JC006790, 2011b.

623 Nan, F., Xue, H., Chai, F., Wang, D., Yu, F., Shi, M., Guo, P. and Xiu, P.: Weakening of the Kuroshio  
624 intrusion into the South China Sea over the past two decades. *Journal of Climate*, 26, 8097–8110, doi:  
625 10.1175/JCLI-D-12-00315.1, 2013.

626 Nan, F., Xue, H. and Yu, F.: Kuroshio intrusion into the South China Sea: A review. *Progress in*  
627 *Oceanography*, 137(A), 314–333, doi: 10.1016/j.pocean.2014.05.012, 2015.

628 Okubo, A.: Horizontal dispersion of floatable particles in the vicinity of velocity singularity such as  
629 convergences. *Deep Sea Research*, 17, 445–454, 1970.

630 Pham, D. T., Verron, J., and Roubaud, M. C.: A singular evolutive extended Kalman filter for data  
631 assimilation in oceanography, *J. Mar. Syst.*, 16, 323–340, 1998.

632 Price, J., Sanford, T., Forristall, G.: Forced stage response to a moving hurricane. *J. Phys. Oceanogr.*,  
633 24(2), 233–260, 1994.

634 Qu, T.: Upper-layer circulation in the South China Sea. *J. Phys. Oceanogr.*, 90, 1450–1460, 2000.

635 Qu, T., Mitsudera, H. and Yamagata, T.: Intrusion of the North Pacific waters into the South China Sea.  
636 *J. Geophys. Res.*, 105(C3), 6415–6424, 2000.

637 Rio, M. H., Hernandez F.: A mean dynamic topography computed over the world ocean from altimetry,  
638 in situ measurements, and a geoid model, *J. Geophys. Res.*, 109, C12032, 2004

639 Roulet, G. and Madec, G.: Salt conservation, free surface, and varying levels: a new formulation for  
640 ocean general circulation models, *J. Geophys. Res.*, 105, 23927–23942, 2000.

641 Shapiro, R.: Linear Filtering. *Math. Comput.*, 29, 1094–1097, 1975.

642 Shchepetkin, A. and McWilliams, J.: The regional oceanic modeling system (ROMS): a split-explicit,  
643 free-surface, topography-following-coordinate oceanic model. *Ocean Modell.*, 9, 347–404,  
644 doi:10.1016/j.ocemod.2004.08.002, 2005.

645 Su, J.: Overview of the South China Sea circulation and its dynamics. *Acta Oceanologica Sinica*, 27(6),  
646 1–8, 2005.

647 Takano, K., Harashima, A. and Namba, T.: A numerical simulation of the circulation in the South China  
648 Sea—preliminary results. *Acta Oceanogr. Taiwanica*, 37, 165–186, 1998.

649 Wang, D., Liu, Y., Qi, Y., and Shi, P.: Seasonal variability of thermal fronts in the northern South China  
650 Sea from satellite data. *Geophys. Res. Lett.*, 28(20), 3963–3966, 2001.

651 Wang, D., Xu, H., Lin, J. and Hu, J.: Anticyclonic eddies in the northeastern South China Sea during  
652 winter 2003/2004. *J. of Oceanogr.*, 64(6), 925–935, 2008.

653 Wang, G., Su, J. and Chu P.: Mesoscale eddies in the South China Sea observed with altimeter data,  
654 *Geophys. Res. Lett.*, 30(21), 2121, doi:10.1029/2003GL018532, 2003.

655 Wang, G., Chen, D. and Su, J.: Winter eddy genesis in the Eastern South China Sea due to orographic  
656 wind jets. *J. of Phys. Oceanogr.*, 38(3), 726–732, 2008

657 [Wang, H., Wang, Z., Zhu, X., Wang, D., Liu, G., 2012a. Numerical study and prediction of nuclear](#)  
658 [contaminant transport from Fukushima Daiichi nuclear power plant in the North Pacific Ocean. \*Chin.\*](#)  
659 [Sci. Bull. 57, 3518–3524. <http://dx.doi.org/10.1007/s11434-012-5171-6>.](#)

660 Wang, J.: Global linear stability of the 2-D shallow-water equations: An application of the distributive  
661 theorem of roots for polynomials in the unit circle. *Mon. Wea. Rev.*, 124, 1301–1310, 1996.

662 Wang, J. and Chern, C.: The warm-core eddy in the northern South China Sea, I. Preliminary  
663 observations on the warm-core eddy, *Acta Oceanogr. Taiwan*, 18, 92–103, 1987. (in Chinese with  
664 English abstract)

665 Weiss, J.: The dynamics of enstrophy transfer in two dimensional hydrodynamics. *Physica D.*, 48, 273–  
666 294, 1991.

667 Williamson, G.: Hydrography and weather of the Hong Kong fishing ground. *Hong Kong Fisheries*  
668 *Bulletin*, 1, 43–49, 1970.

669 Wu, C. and Chiang, T.: Mesoscale eddies in the northern South China Sea. *Deep-Sea Res. II*, 54, 1575–  
670 1588, 2007.



671 Wu, C., Shaw, P. and Chao, S.: Assimilating altimetric data into a South China Sea model. *J. Geophys.*  
672 *Res.*, 104(C12), 29987–30005, 1999.

673 Wu, C., Chang, Y., Oey, L., et al.: Air-sea interaction between tropical cyclone Nari and Kuroshio.  
674 *Geophys. Res. Lett.*, 35(12), L12605, 2008.

675 Wyrтки, K.: Scientific results of marine investigation of the South China Sea and Gulf of Thailand. Naga  
676 Rep. 2, 195, 1961.

677 Xiu, P., Chai, F., Shi, L., Xue, H. and Chao, Y.: A census of eddy activities in the South China Sea during  
678 1993–2007. *J. Geophys. Res.*, 115, C03012, doi:10.1029/2009JC005657, 2010.

679 Zhang, F., Wang, W., Huang, Q., Li, Y. and Chau, K.: Summary current structure in Bashi Channel. In  
680 *Proceedings of Symposium of Marine Sciences in Taiwan Strait and Its Adjacent Waters*, 65–72, China  
681 Ocean Press, Beijing, 1995.

682 Zhang, Z., Zhao, W., Tian, J. and Liang, X.: A mesoscale eddy pair southwest of Taiwan and its influence  
683 on deep circulation, *J. Geophys. Res. Oceans*, 118, 6479–6494, doi:10.1002/2013JC008994, 2013.

684 Zhuang, W., Xie, S., Wang, D., Taguchi, B., Aiki, H. and Sasaki H.: Intraseasonal variability in sea  
685 surface height over the South China Sea, *J. Geophys. Res.*, 115, C04010, doi:10.1029/2009JC005647,  
686 2010.

687  
688  
689  
690  
691  
692  
693  
694  
695  
696  
697  
698  
699  
700  
701  
702  
703  
704  
705  
706

707  
 708  
 709  
 710  
 711  
 712  
 713  
 714  
 715  
 716  
 717  
 718  
 719  
 720  
 721  
 722  
 723  
 724

Table 1 Eddy Numbers of different datatype

|         | AVISO |       |       | MO   |       |       | SCSOFS |       |       |
|---------|-------|-------|-------|------|-------|-------|--------|-------|-------|
|         | CYCL  | ACYCL | TOTAL | CYCL | ACYCL | TOTAL | CYCL   | ACYCL | TOTAL |
| Spring  | 6     | 3     | 9     | 6    | 7     | 13    | 6      | 3     | 9     |
| Summer  | 2     | 3     | 5     | 4    | 7     | 11    | 3      | 5     | 8     |
| Fall    | 2     | 1     | 3     | 6    | 7     | 13    | 2      | 1     | 3     |
| Winter  | 5     | 2     | 7     | 5    | 5     | 10    | 1      | 3     | 4     |
| Overall | 15    | 9     | 24    | 21   | 26    | 47    | 12     | 12    | 24    |

725
